# Supplementary material for: Synthesis, structures and ab initio studies of selenium and tellurium bis(carbodithioates and carbothioates)
Source: Royal Society of Chemistry journal article supplement (doi:10.1039/c1dt10208g), 2011-01-01
Supplement: c1dt10208g.pdf [file c1dt10208g.pdf]

**Kato (ESI-Exp.)**

1/1

ESI-Exp:

Equations for the five correlation plots in Figs 6 and 7 as the following:

$$y = 0.482x - 31.7 \quad (R^2 = 0.996) \quad (\text{A})$$

$$y = 1.105x - 15.3 \quad (R^2 = 0.9999) \quad (\text{B})$$

$$y = 0.965x - 36.2 \quad (R^2 = 0.9998) \quad (\text{C})$$

$$y = 1.259x + 6.2 \quad (R^2 = 0.999) \quad (\text{D})$$

$$y = 1.109x - 10.4 \quad (R^2 = 0.999) \quad (\text{E})$$

**ESI-Table 1** Geometric parameters (bond distances and angles) of the optimized structures for E(SSC<sub>6</sub>H<sub>4</sub>OMe-2)<sub>2</sub> **2e** – **4e** and E(SSCMe)<sub>2</sub> **2a** – **4a** (E = S, Se, Te)<sup>a</sup>

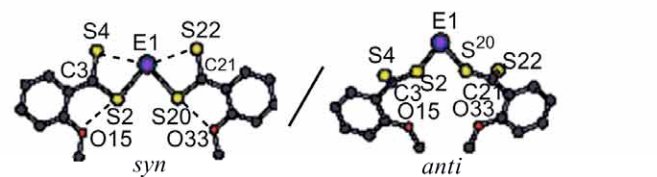

|               | E1 = S ( <b>4e</b> ) <sup>b</sup> | Se ( <b>2e</b> ) <sup>c</sup> | Te ( <b>3e</b> ) <sup>c</sup> |
|---------------|-----------------------------------|-------------------------------|-------------------------------|
| E1...S4       | 3.382                             | 2.821                         | 2.854                         |
| E1-S2         | 2.068                             | 2.331                         | 2.470                         |
| C3-S2         | 1.767                             | 1.734                         | 1.726                         |
| C3=S4         | 1.623                             | 1.659                         | 1.670                         |
| O15...S2      | 3.089                             | 2.602                         | 2.650                         |
| ∠S2-E1-S20    | 106.9                             | 87.6                          | 80.9                          |
| ∠S4-C3-S2     | 126.6                             | 118.7                         | 117.9                         |
| ∠S4-E1-S20    | 133.1                             | 155.2                         | 146.7                         |
| ∠S4-E1-S2     | 62.5                              | 68.8                          | 65.8                          |
| ∠C3-S2-E1     | 105.3                             | 94.0                          | 93.9                          |
| ∠C(3)-S4-E1   | 64.4                              | 78.4                          | 82.4                          |
| ∠O15-S2-E1    | 125.7                             | 173.9                         | 172.9                         |
| ϕC3-S2-E1-S20 | 70.8                              | 180.0                         | 180.0                         |
| ϕS2-C3-C6-O15 | 25.7                              | 0.0                           | 0.0                           |

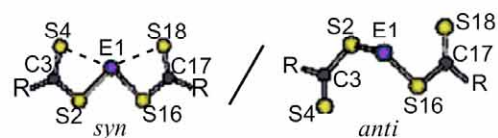

|              | E1 = S ( <b>4a</b> ) <sup>b</sup> | Se ( <b>2a</b> ) <sup>c</sup> | Te ( <b>3a</b> ) <sup>c</sup> |
|--------------|-----------------------------------|-------------------------------|-------------------------------|
| E1...S4      | 3.351                             | 2.845                         | 2.876                         |
| E1-S2        | 2.065                             | 2.291                         | 2.476                         |
| C3-S2        | 1.779                             | 1.723                         | 1.714                         |
| C3=S4        | 1.620                             | 1.643                         | 1.654                         |
| ∠S2-E1-S9    | 106.1                             | 88.1                          | 82.3                          |
| ∠S4-C3-S2    | 126.3                             | 121.7                         | 121.1                         |
| ∠S4-E1-S9    | 127.4                             | 157.0                         | 148.3                         |
| ∠S4-E1-S2    | 63.0                              | 68.9                          | 66.0                          |
| ∠C3-S2-E1    | 105.3                             | 92.9                          | 92.4                          |
| ϕC3-S2-E1-S9 | 80.0                              | 180.0                         | 180.0                         |
| ϕS4-C3-S2-E1 | -8.4                              | 0.0                           | 0.0                           |

<sup>a</sup>Distances are in angstrom (Å), angles (∠) and torsion (ϕ) in degrees.  
<sup>b</sup>anti-Conformer (C2). <sup>c</sup>syn-Conformer (C2v).

**ESI-Table 2** Geometric parameters (bond distances and angles) of the optimized structures for *anti*-E(SOCPh)<sub>2</sub> (E = S, Se, Te)<sup>a</sup>

|                    | XRD values                       |                               |                               |
|--------------------|----------------------------------|-------------------------------|-------------------------------|
|                    | E = S ( <b>4d</b> ) <sup>b</sup> | Se ( <b>2d</b> ) <sup>d</sup> | Te ( <b>3d</b> ) <sup>e</sup> |
| E...O(4)           | 3.007                            | 3.11(2)                       | 3.242(2)                      |
| E-S(2)             | 2.020                            | 2.174(1)                      | 2.379(2)                      |
| C(3)-S(2)          | 1.805                            | 1.827(5)                      | 1.832(6)                      |
| C(3)=O(4)          | 1.210                            | 1.187(7)                      | 1.199(9)                      |
| ∠S(2)-E-S(16)      | 107.3 <sup>c</sup>               | 105.0(1)                      | 103.1(1)                      |
| ∠O(4)-C(3)-S(2)    | 121.7                            | 121.6(3)                      | 121.0(4)                      |
| ∠O(4)-E-O(18)      | -                                | -                             | -                             |
| ∠O(4)-E-S(2)       | 59.8                             | -                             | -                             |
| ∠C(3)-S(2)-S(1)    | 101.6                            | 102.1(2)                      | 102.5(2)                      |
| ∠C(3)-S(2)-E-S(16) | 80.7                             | -                             | -                             |
| ∠O(4)-C(3)-S(2)-E  | -7.7                             | -                             | -                             |

  

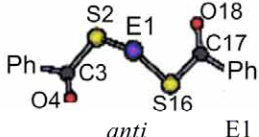

|               | calculated values <sup>f</sup> |                  |                  |
|---------------|--------------------------------|------------------|------------------|
|               | E1 = S ( <b>4d</b> )           | Se ( <b>2d</b> ) | Te ( <b>3d</b> ) |
| E1...O4       | 3.037                          | 3.139            | 3.214            |
| E1-S2         | 2.062                          | 2.200            | 2.366            |
| C3-S2         | 1.818                          | 1.822            | 1.830            |
| C3=O4         | 1.211                          | 1.211            | 1.211            |
| ∠S2-E1-S16    | 106.6                          | 102.1            | 99.6             |
| ∠O4-C3-S2     | 122.7                          | 123.1            | 122.7            |
| ∠O4-E1-O18    | 123.4                          | 117.4            | 115.2            |
| ∠O4-E1-S2     | 59.7                           | 56.2             | 55.0             |
| ∠C3-S2-E1     | 100.5                          | 101.1            | 100.7            |
| ∠C3-S2-E1-S16 | 80.3                           | 78.6             | 78.7             |
| ∠O4-C3-S2-E1  | 11.5                           | 11.6             | 10.2             |

<sup>a</sup>Distances are in angstrom (Å), angles (∠) and torsion (∠) in degrees. <sup>b</sup>Values taken from compound (PhCOS)<sub>2</sub> (CCDC record: DBZOSS03). <sup>c</sup>Values taken from compound F<sub>3</sub>CSSSCF<sub>3</sub> in ref 10. <sup>d</sup>Values taken from ref 8. <sup>e</sup>Values taken from ref 9. <sup>f</sup>*Anti*-conformer (C<sub>2</sub> symmetry)

**ESI-Table 3** Relative energies of the *syn*- and *anti*-conformers of E(SE'CR)<sub>2</sub> **2–13** (E = O, S, Se, Te; E' = O, S; R = Me, Ph, C<sub>6</sub>H<sub>4</sub>OMe-2)

| compounds                                                                        | energy (au)   |               | $\Delta E^a$<br>kJ/mol |
|----------------------------------------------------------------------------------|---------------|---------------|------------------------|
|                                                                                  | <i>syn</i> -  | <i>anti</i> - |                        |
| O(SSCMe) <sub>2</sub> ( <b>12</b> )                                              | -1821.1157772 | -1821.1351023 | -50.7                  |
| S(SSCMe) <sub>2</sub> ( <b>4a</b> )                                              | -2143.7575830 | -2143.7727237 | -39.8                  |
| Se(SSCMe) <sub>2</sub> ( <b>2a</b> )                                             | -4146.1850305 | -4146.1874376 | -6.3                   |
| Te(SSCMe) <sub>2</sub> ( <b>3a</b> )                                             | -8358.0438517 | -8358.0278258 | 42.1                   |
| O(SSCPh) <sub>2</sub> ( <b>10</b> ) <sup>b</sup>                                 | -             | -             | -                      |
| S(SSCPh) <sub>2</sub> ( <b>4d</b> )                                              | -2526.0211974 | -2526.0438730 | -59.5                  |
| Se(SSCPh) <sub>2</sub> ( <b>2d</b> )                                             | -4528.4496801 | -4528.4580218 | -21.9                  |
| Te(SSCPh) <sub>2</sub> ( <b>3d</b> )                                             | -8740.3097485 | -8740.2979421 | 31.0                   |
| O(SSCC <sub>6</sub> H <sub>4</sub> OMe-2) <sub>2</sub> ( <b>8</b> ) <sup>b</sup> | -             | -             | -                      |
| S(SSCC <sub>6</sub> H <sub>4</sub> OMe-2) <sub>2</sub> ( <b>4e</b> )             | -2754.4739911 | -2754.5023544 | -74.5                  |
| Se(SSCC <sub>6</sub> H <sub>4</sub> OMe-2) <sub>2</sub> ( <b>2e</b> )            | -4756.9002324 | -4756.9164138 | -42.5                  |
| Te(SSCC <sub>6</sub> H <sub>4</sub> OMe-2) <sub>2</sub> ( <b>3e</b> )            | -8968.7560914 | -8968.7543828 | 4.5                    |
| -----                                                                            |               |               |                        |
| O(SOCMe) <sub>2</sub> ( <b>13</b> )                                              | -1175.9749332 | -1175.9957708 | -54.7                  |
| S(SOCMe) <sub>2</sub> ( <b>7a</b> )                                              | -1498.6180248 | -1498.6380838 | -52.7                  |
| Se(SOCMe) <sub>2</sub> ( <b>5a</b> )                                             | -3501.0401046 | -3501.0532058 | -34.4                  |
| Te(SOCMe) <sub>2</sub> ( <b>6a</b> )                                             | -7712.8862231 | -7712.8905401 | -11.3                  |
| O(SOCPh) <sub>2</sub> ( <b>11</b> ) <sup>b</sup>                                 | -             | -             | -                      |
| S(SOCPh) <sub>2</sub> ( <b>7d</b> )                                              | -1880.8782175 | -1880.9009239 | -59.6                  |
| Se(SOCPh) <sub>2</sub> ( <b>5d</b> )                                             | -3883.3007571 | -3883.3152784 | -38.1                  |
| Te(SOCPh) <sub>2</sub> ( <b>6d</b> )                                             | -8095.1497105 | -8095.1526333 | -7.7                   |
| O(SOCC <sub>6</sub> H <sub>4</sub> OMe-2) <sub>2</sub> ( <b>9</b> ) <sup>b</sup> | -             | -             | -                      |
| S(SOCC <sub>6</sub> H <sub>4</sub> OMe-2) <sub>2</sub> ( <b>7e</b> )             | -2109.3331641 | -2109.3515268 | -48.2                  |
| Se(SOCC <sub>6</sub> H <sub>4</sub> OMe-2) <sub>2</sub> ( <b>5e</b> )            | -4111.7545049 | -4111.7649057 | -27.3                  |
| Te(SOCC <sub>6</sub> H <sub>4</sub> OMe-2) <sub>2</sub> ( <b>6e</b> )            | -8323.5999567 | -8323.6008410 | -2.3                   |

<sup>a</sup> $E$  (*anti*-conformer) –  $E$  (*syn*-conformer). <sup>b</sup>For compounds **8**, **9**, **10** and **11**, the optimized structures of *syn*- and *trans*-conformers were not obtained.

**ESI-Table 4** Geometric parameters (bond distances and angles) of the optimized structures for compounds **5e** – **7e** E(SOCC<sub>6</sub>H<sub>4</sub>OMe-2)<sub>2</sub> and **5a** – **7a** E(SOCMe)<sub>2</sub> (E = S, Se, Te)<sup>a</sup>

|               | E1 = S ( <b>7e</b> ) | Se ( <b>5e</b> ) | Te ( <b>6e</b> ) |
|---------------|----------------------|------------------|------------------|
| E1...O4       | 2.980                | 3.091            | 3.195            |
| E1-S2         | 2.068                | 2.206            | 2.371            |
| C3-S2         | 1.817                | 1.818            | 1.826            |
| C3=O4         | 1.214                | 1.213            | 1.246            |
| O15...S2      | 2.689                | 2.735            | 2.796            |
| ∠S2-E-S16     | 106.5                | 102.2            | 100.1            |
| ∠O4-C3-S2     | 121.7                | 122.2            | 122.1            |
| ∠O4-E1-O22    | 122.2                | 116.9            | 117.9            |
| ∠O4-E1-S2     | 60.5                 | 57.7             | 55.1             |
| ∠C3-S2-E1     | 99.9                 | 100.6            | 100.2            |
| ∠O4-C3-O15    | 163.9                | 159.5            | 153.3            |
| ∠O15-S2-E1    | 164.5                | 162.2            | 165.2            |
| φC3-S2-E1-S16 | 74.1                 | 72.1             | 81.6             |
| φC3-S2-O15-C6 | 22.1                 | 27.7             | 32.9             |

  

|              | E1 = S ( <b>7a</b> ) <sup>b</sup> | Se ( <b>5a</b> ) <sup>b</sup> | Te ( <b>6a</b> ) <sup>b</sup> |
|--------------|-----------------------------------|-------------------------------|-------------------------------|
| E1...O4      | 3.061                             | 3.161                         | 3.251                         |
| E1-S2        | 2.062                             | 2.200                         | 2.363                         |
| C3-S2        | 1.818                             | 1.822                         | 1.832                         |
| C3=O4        | 1.207                             | 1.206                         | 1.206                         |
| ∠S2-E1-S9    | 105.5                             | 102.5                         | 101.6                         |
| ∠O4-C3-S2    | 123.3                             | 123.6                         | 123.4                         |
| ∠O4-E1-O11   | 127.3                             | 122.3                         | 121.4                         |
| ∠O4-E1-S2    | 59.2                              | 56.8                          | 54.5                          |
| ∠C3-S2-E1    | 101.3                             | 101.8                         | 101.6                         |
| φC3-S2-E-S9  | 81.4                              | 80.3                          | 81.3                          |
| φO4-C3-S2-E1 | -7.1                              | 7.0                           | 5.3                           |

<sup>a</sup>Distances are in angstrom (Å), angles (∠) and torsion (φ) in degrees.

<sup>b</sup>C2 symmetry.

ESI-Table 5 NBO analyses of E1(SOCR)<sub>2</sub> (E1 = O, S, Se, Te; R = Me, Ph, C<sub>6</sub>H<sub>4</sub>OMe-2) **5**, **6**, **7**, **9**, **11** and **13**

|                       |                                    | <i>E<sup>b</sup></i> [kJ/mol]          |                                         |                                         |                                        |                                        |                                         |  |
|-----------------------|------------------------------------|----------------------------------------|-----------------------------------------|-----------------------------------------|----------------------------------------|----------------------------------------|-----------------------------------------|--|
|                       |                                    |                                        |                                         |                                         |                                        |                                        |                                         |  |
| E1(SOCR) <sub>2</sub> |                                    | $n_{O4} \rightarrow \sigma^*_{E1-S16}$ | $n_{O4} \rightarrow \sigma^*_{E1-S2}$   | $n_{S2} \rightarrow \pi^*_{C3=O4}$      | $n_{O4} \rightarrow \sigma^*_{E1-S16}$ | $n_{O4} \rightarrow \sigma^*_{E1-S2}$  | $n_{S2} \rightarrow \pi^*_{C3=O4}$      |  |
| No.                   | R                                  | $n_{O18} \rightarrow \sigma^*_{E1-S2}$ | $n_{O18} \rightarrow \sigma^*_{E1-S16}$ | $n_{S9} \rightarrow \pi^*_{C10=O11}$    | $n_{O18} \rightarrow \sigma^*_{E1-S2}$ | $n_{O4} \rightarrow \sigma^*_{E1-S2}$  | $n_{S9} \rightarrow \pi^*_{C10=O11}$    |  |
| <b>13</b>             | Me                                 | -                                      | -                                       | 86.2                                    | -                                      | -                                      | 92.2                                    |  |
| <b>7a</b>             | S                                  | 4.6                                    | -                                       | 91.0                                    | -                                      | -                                      | 76.3                                    |  |
| <b>5a</b>             | Se                                 | 9.6                                    | 2.8                                     | 95.9                                    | -                                      | -                                      | 75.1                                    |  |
| <b>6a</b>             | Te                                 | 20.0                                   | 10.4                                    | 109.5                                   | -                                      | -                                      | 72.3                                    |  |
| <b>11<sup>c</sup></b> | Ph                                 | -                                      | -                                       | -                                       | -                                      | -                                      | -                                       |  |
| <b>7b</b>             | S                                  | 7.2                                    | -                                       | 84.5                                    | -                                      | -                                      | 73.2                                    |  |
| <b>5d</b>             | Se                                 | 12.8                                   | 3.6                                     | 90.1                                    | -                                      | -                                      | 72.4                                    |  |
| <b>6d</b>             | Te                                 | 25.8                                   | 12.6                                    | 104.8                                   | -                                      | -                                      | 70.8                                    |  |
|                       |                                    |                                        |                                         |                                         |                                        |                                        |                                         |  |
| E1(SOCR) <sub>2</sub> |                                    | $n_{O4} \rightarrow \sigma^*_{E1-S20}$ | $n_{O4} \rightarrow \sigma^*_{E1-S2}$   | $n_{O15} \rightarrow \sigma^*_{S2-E1}$  | $n_{S2} \rightarrow \pi^*_{C3=O4}$     | $n_{O4} \rightarrow \sigma^*_{E1-S20}$ | $n_{O4} \rightarrow \sigma^*_{E1-S2}$   |  |
| No.                   | R                                  | $n_{O22} \rightarrow \sigma^*_{E1-S2}$ | $n_{O22} \rightarrow \sigma^*_{E1-S20}$ | $n_{O33} \rightarrow \sigma^*_{S20-E1}$ | $n_{O33} \rightarrow \pi^*_{C21=O22}$  | $n_{O22} \rightarrow \sigma^*_{E1-S2}$ | $n_{O22} \rightarrow \sigma^*_{E1-S20}$ |  |
| <b>9<sup>c</sup></b>  | 2-MeOC <sub>6</sub> H <sub>4</sub> | -                                      | -                                       | -                                       | -                                      | -                                      | -                                       |  |
| <b>7d</b>             | S                                  | 7.8                                    | -                                       | 9.4                                     | 92.4                                   | -                                      | 7.2                                     |  |
| <b>5e</b>             | Se                                 | 13.0                                   | 3.8                                     | 8.8                                     | 97.7                                   | -                                      | 7.4                                     |  |
| <b>6e</b>             | Te                                 | 22.8                                   | 12.8                                    | 6.4                                     | 111.4                                  | -                                      | 5.4                                     |  |

<sup>a</sup>Analyses for the calculation on compounds **5a**, **5d**, **5e**, **7a**, **7b**, **7d** and **13** were carried out at MP2/6-311G(2d, p) level of theory for O, S and Se and those of the compounds **6a**, **6d** and **6e** are at MP2/7433111/7431111/7411/2 +1s1p1d1f level for Te and 6.31G for C and H, respectively. <sup>b</sup>Stabilization energies associated with delocalization. <sup>c</sup>The optimized structures for the both *syn*- and *anti*-conformers of compounds **9** and **11** were not obtained.

**Optimized Structures Given by Cartesian Coordinates for the compounds 2–7, 12, and 13**

Quantum chemical calculations were performed on the chalcogen compounds using Gaussian 03 program.<sup>35</sup> The structures were optimized with the 6-311+G(d) basis sets for O, S, and Se and the reported ones of the (7433111/743111/7411/2 + 1s1p1d1f)<sup>36</sup> type for the Te atom with the 6-31G(d) basis sets for C and H at the Møller-Plesset second order energy correlation (MP2)<sup>37</sup> level.

**ESI-Table 6** Optimized Structures Given by Cartesian Coordinates for the compounds 2–7, 12, and 13

O(SSCMe)<sub>2</sub> (**12**)-*syn*

Total energy: -1821.1157772 hartrees

|    |   |           |           |           |
|----|---|-----------|-----------|-----------|
| 8  | 0 | 0.000000  | 0.000000  | 0.255524  |
| 16 | 0 | 0.000000  | 1.398020  | 1.236766  |
| 6  | 0 | 0.000000  | 2.581985  | -0.038443 |
| 16 | 0 | 0.000000  | 2.226098  | -1.621118 |
| 6  | 0 | 0.000000  | 3.976171  | 0.550963  |
| 1  | 0 | 0.000000  | 3.972877  | 1.647873  |
| 1  | 0 | -0.886215 | 4.512615  | 0.202272  |
| 1  | 0 | 0.886215  | 4.512615  | 0.202272  |
| 16 | 0 | 0.000000  | -1.398020 | 1.236766  |
| 6  | 0 | 0.000000  | -2.581985 | -0.038443 |
| 16 | 0 | 0.000000  | -2.226098 | -1.621118 |
| 6  | 0 | 0.000000  | -3.976171 | 0.550963  |
| 1  | 0 | 0.000000  | -3.972877 | 1.647873  |
| 1  | 0 | -0.886215 | -4.512615 | 0.202272  |
| 1  | 0 | 0.886215  | -4.512615 | 0.202272  |

O(SSCMe)<sub>2</sub> (**12**)-*anti*

Total energy: -1821.1351023 hartrees

|    |   |           |           |           |
|----|---|-----------|-----------|-----------|
| 8  | 0 | 0.000000  | 0.000000  | 0.999657  |
| 16 | 0 | 0.774755  | 1.211701  | 0.131767  |
| 6  | 0 | -0.537590 | 2.319984  | -0.185733 |
| 16 | 0 | -2.099910 | 2.039732  | 0.162146  |
| 6  | 0 | 0.000000  | 3.595919  | -0.794675 |
| 1  | 0 | 0.153460  | 4.336325  | -0.002852 |
| 1  | 0 | 0.955119  | 3.441052  | -1.310782 |
| 1  | 0 | -0.727990 | 3.992008  | -1.505167 |
| 16 | 0 | -0.774755 | -1.211701 | 0.131767  |
| 6  | 0 | 0.537590  | -2.319984 | -0.185733 |
| 16 | 0 | 2.099910  | -2.039732 | 0.162146  |
| 6  | 0 | 0.000000  | -3.595919 | -0.794675 |
| 1  | 0 | -0.153460 | -4.336325 | -0.002852 |
| 1  | 0 | -0.955119 | -3.441052 | -1.310782 |
| 1  | 0 | 0.727990  | -3.992008 | -1.505167 |

S(SSCMe)<sub>2</sub> (**4a**)-*syn*

Total energy: -2143.757583 hartrees

|    |   |          |          |           |
|----|---|----------|----------|-----------|
| 16 | 0 | 0.000000 | 0.000000 | 0.313768  |
| 16 | 0 | 0.000000 | 1.514825 | -1.181787 |
| 6  | 0 | 0.000000 | 2.861173 | -0.085667 |

|    |   |           |           |           |
|----|---|-----------|-----------|-----------|
| 16 | 0 | 0.000000  | 2.696026  | 1.538521  |
| 6  | 0 | 0.000000  | 4.192744  | -0.801061 |
| 1  | 0 | 0.884672  | 4.762653  | -0.503836 |
| 1  | 0 | 0.000000  | 4.079986  | -1.889847 |
| 1  | 0 | -0.884672 | 4.762653  | -0.503836 |
| 16 | 0 | 0.000000  | -1.514825 | -1.181787 |
| 6  | 0 | 0.000000  | -2.861173 | -0.085667 |
| 16 | 0 | 0.000000  | -2.696026 | 1.538521  |
| 6  | 0 | 0.000000  | -4.192744 | -0.801061 |
| 1  | 0 | 0.884672  | -4.762653 | -0.503836 |
| 1  | 0 | 0.000000  | -4.079986 | -1.889847 |
| 1  | 0 | -0.884672 | -4.762653 | -0.503836 |

S(SSCMe)<sub>2</sub> (**4a**)-*anti*

Total energy: -2143.7727237 hartrees

|    |   |           |           |           |
|----|---|-----------|-----------|-----------|
| 16 | 0 | 0.000000  | 0.000000  | 1.412030  |
| 16 | 0 | 1.114324  | 1.199729  | 0.162981  |
| 6  | 0 | 0.000000  | 2.487567  | -0.354623 |
| 16 | 0 | -1.593956 | 2.547430  | -0.071716 |
| 6  | 0 | 0.780904  | 3.531365  | -1.119235 |
| 1  | 0 | 1.404572  | 4.108892  | -0.427667 |
| 1  | 0 | 1.441538  | 3.066446  | -1.859566 |
| 1  | 0 | 0.090403  | 4.207111  | -1.626098 |
| 16 | 0 | -1.114324 | -1.199729 | 0.162981  |
| 6  | 0 | 0.000000  | -2.487567 | -0.354623 |
| 16 | 0 | 1.593956  | -2.547430 | -0.071716 |
| 6  | 0 | -0.780904 | -3.531365 | -1.119235 |
| 1  | 0 | -1.404572 | -4.108892 | -0.427667 |
| 1  | 0 | -1.441538 | -3.066446 | -1.859566 |
| 1  | 0 | -0.090403 | -4.207111 | -1.626098 |

Se(SSCMe)<sub>2</sub> (**2a**)-*syn*

Total energy: -4146.1850305 hartrees

|    |   |           |           |           |
|----|---|-----------|-----------|-----------|
| 34 | 0 | 0.000000  | 0.000000  | 0.347072  |
| 16 | 0 | 0.000000  | 1.593619  | -1.299238 |
| 6  | 0 | 0.000000  | 2.890510  | -0.164675 |
| 16 | 0 | 0.000000  | 2.620939  | 1.455782  |
| 6  | 0 | 0.000000  | 4.271009  | -0.777304 |
| 1  | 0 | 0.000000  | 4.231795  | -1.870539 |
| 1  | 0 | 0.884644  | 4.819622  | -0.441260 |
| 1  | 0 | -0.884644 | 4.819622  | -0.441260 |
| 16 | 0 | 0.000000  | -1.593619 | -1.299238 |
| 6  | 0 | 0.000000  | -2.890510 | -0.164675 |
| 16 | 0 | 0.000000  | -2.620939 | 1.455782  |
| 6  | 0 | 0.000000  | -4.271009 | -0.777304 |
| 1  | 0 | 0.000000  | -4.231795 | -1.870539 |
| 1  | 0 | 0.884644  | -4.819622 | -0.441260 |
| 1  | 0 | -0.884644 | -4.819622 | -0.441260 |

Se(SSCMe)<sub>2</sub> (**2a**)-*anti*

Total energy: -4146.1874376 hartrees



|    |   |           |           |           |
|----|---|-----------|-----------|-----------|
| 34 | 0 | 0.000000  | 0.000000  | 1.362255  |
| 16 | 0 | 0.000000  | 1.711467  | -0.016370 |
| 6  | 0 | -1.675447 | 1.840366  | -0.611984 |
| 16 | 0 | -2.879920 | 0.794154  | -0.333913 |
| 6  | 0 | -1.790711 | 3.079961  | -1.471085 |
| 1  | 0 | -1.557330 | 3.975207  | -0.884401 |
| 1  | 0 | -1.085134 | 3.033511  | -2.308321 |
| 1  | 0 | -2.805965 | 3.158645  | -1.862680 |
| 16 | 0 | 0.000000  | -1.711467 | -0.016370 |
| 6  | 0 | 1.675447  | -1.840366 | -0.611984 |
| 16 | 0 | 2.879920  | -0.794154 | -0.333913 |
| 6  | 0 | 1.790711  | -3.079961 | -1.471085 |
| 1  | 0 | 1.557330  | -3.975207 | -0.884401 |
| 1  | 0 | 1.085134  | -3.033511 | -2.308321 |
| 1  | 0 | 2.805965  | -3.158645 | -1.862680 |

Te(SSCMe)<sub>2</sub> (**3a**)-*syn*

Total energy: -8358.0438517 hartrees

|    |   |           |           |           |
|----|---|-----------|-----------|-----------|
| 52 | 0 | 0.000000  | 0.000000  | 0.470705  |
| 16 | 0 | 0.000000  | 1.629611  | -1.393969 |
| 6  | 0 | 0.000000  | 2.967381  | -0.322626 |
| 16 | 0 | 0.000000  | 2.748532  | 1.316439  |
| 6  | 0 | 0.000000  | 4.338388  | -0.958032 |
| 1  | 0 | 0.884601  | 4.893971  | -0.632108 |
| 1  | 0 | 0.000000  | 4.275427  | -2.049687 |
| 1  | 0 | -0.884601 | 4.893971  | -0.632108 |
| 16 | 0 | 0.000000  | -1.629611 | -1.393969 |
| 6  | 0 | 0.000000  | -2.967381 | -0.322626 |
| 16 | 0 | 0.000000  | -2.748532 | 1.316439  |
| 6  | 0 | 0.000000  | -4.338388 | -0.958032 |
| 1  | 0 | 0.884601  | -4.893971 | -0.632108 |
| 1  | 0 | 0.000000  | -4.275427 | -2.049687 |
| 1  | 0 | -0.884601 | -4.893971 | -0.632108 |

Te(SSCMe)<sub>2</sub> (**3a**)-*anti*

Total energy: -8358.0278258 hartrees

|    |   |           |           |           |
|----|---|-----------|-----------|-----------|
| 52 | 0 | 0.000000  | 0.000000  | 1.290812  |
| 16 | 0 | 0.000000  | 1.812256  | -0.226366 |
| 6  | 0 | -1.680063 | 1.905041  | -0.841788 |
| 16 | 0 | -2.851645 | 0.824313  | -0.556971 |
| 6  | 0 | -1.825236 | 3.138698  | -1.704439 |
| 1  | 0 | -1.673687 | 4.040364  | -1.100541 |
| 1  | 0 | -1.072473 | 3.139648  | -2.500892 |
| 1  | 0 | -2.821343 | 3.163302  | -2.148940 |
| 16 | 0 | 0.000000  | -1.812256 | -0.226366 |
| 6  | 0 | 1.680063  | -1.905041 | -0.841788 |
| 16 | 0 | 2.851645  | -0.824313 | -0.556971 |
| 6  | 0 | 1.825236  | -3.138698 | -1.704439 |
| 1  | 0 | 1.673687  | -4.040364 | -1.100541 |
| 1  | 0 | 1.072473  | -3.139648 | -2.500892 |
| 1  | 0 | 2.821343  | -3.163302 | -2.148940 |

S(SSCPh)<sub>2</sub> (**4d**)-*syn*

Total energy: -2526.0211974 hartrees

|    |   |          |           |           |
|----|---|----------|-----------|-----------|
| 16 | 0 | 0.000000 | 0.000000  | 0.876090  |
| 16 | 0 | 0.000000 | 1.502118  | -0.643710 |
| 6  | 0 | 0.000000 | 2.853586  | 0.466108  |
| 16 | 0 | 0.000000 | 2.599084  | 2.088572  |
| 6  | 0 | 0.000000 | 4.190691  | -0.183534 |
| 6  | 0 | 0.000000 | 4.335218  | -1.584340 |
| 6  | 0 | 0.000000 | 5.349912  | 0.613293  |
| 6  | 0 | 0.000000 | 5.602893  | -2.166022 |
| 6  | 0 | 0.000000 | 6.612887  | 0.025254  |
| 6  | 0 | 0.000000 | 6.748013  | -1.366215 |
| 1  | 0 | 0.000000 | 3.464366  | -2.235842 |
| 1  | 0 | 0.000000 | 5.250465  | 1.695051  |
| 1  | 0 | 0.000000 | 5.693289  | -3.249648 |
| 1  | 0 | 0.000000 | 7.496635  | 0.658882  |
| 1  | 0 | 0.000000 | 7.735207  | -1.822232 |
| 16 | 0 | 0.000000 | -1.502118 | -0.643710 |
| 6  | 0 | 0.000000 | -2.853586 | 0.466108  |
| 16 | 0 | 0.000000 | -2.599084 | 2.088572  |
| 6  | 0 | 0.000000 | -4.190691 | -0.183534 |
| 6  | 0 | 0.000000 | -4.335218 | -1.584340 |
| 6  | 0 | 0.000000 | -5.349912 | 0.613293  |
| 6  | 0 | 0.000000 | -5.602893 | -2.166022 |
| 6  | 0 | 0.000000 | -6.612887 | 0.025254  |
| 6  | 0 | 0.000000 | -6.748013 | -1.366215 |
| 1  | 0 | 0.000000 | -3.464366 | -2.235842 |
| 1  | 0 | 0.000000 | -5.250465 | 1.695051  |
| 1  | 0 | 0.000000 | -5.693289 | -3.249648 |
| 1  | 0 | 0.000000 | -7.496635 | 0.658882  |
| 1  | 0 | 0.000000 | -7.735207 | -1.822232 |

S(SSCPh)<sub>2</sub> (**4d**)-*anti*

Total energy: -2526.043873 hartrees

|    |   |           |           |           |
|----|---|-----------|-----------|-----------|
| 16 | 0 | 0.000000  | 0.000000  | 2.182973  |
| 16 | 0 | 0.481734  | 1.560171  | 0.924211  |
| 6  | 0 | -1.090915 | 2.213544  | 0.408326  |
| 16 | 0 | -2.540989 | 1.512285  | 0.628600  |
| 6  | 0 | -0.874425 | 3.472491  | -0.339140 |
| 6  | 0 | 0.000000  | 4.461519  | 0.149189  |
| 6  | 0 | -1.544383 | 3.680082  | -1.557558 |
| 6  | 0 | 0.179711  | 5.647522  | -0.565586 |
| 6  | 0 | -1.342892 | 4.859042  | -2.273014 |
| 6  | 0 | -0.480243 | 5.845042  | -1.781145 |
| 1  | 0 | 0.495030  | 4.324285  | 1.107748  |
| 1  | 0 | -2.213144 | 2.908886  | -1.932292 |
| 1  | 0 | 0.839548  | 6.416675  | -0.171309 |
| 1  | 0 | -1.856421 | 5.007660  | -3.219971 |
| 1  | 0 | -0.330587 | 6.766161  | -2.339356 |
| 16 | 0 | -0.481734 | -1.560171 | 0.924211  |

|    |   |           |           |           |
|----|---|-----------|-----------|-----------|
| 6  | 0 | 1.090915  | -2.213544 | 0.408326  |
| 16 | 0 | 2.540989  | -1.512285 | 0.628600  |
| 6  | 0 | 0.874425  | -3.472491 | -0.339140 |
| 6  | 0 | 0.000000  | -4.461519 | 0.149189  |
| 6  | 0 | 1.544383  | -3.680082 | -1.557558 |
| 6  | 0 | -0.179711 | -5.647522 | -0.565586 |
| 6  | 0 | 1.342892  | -4.859042 | -2.273014 |
| 6  | 0 | 0.480243  | -5.845042 | -1.781145 |
| 1  | 0 | -0.495030 | -4.324285 | 1.107748  |
| 1  | 0 | 2.213144  | -2.908886 | -1.932292 |
| 1  | 0 | -0.839548 | -6.416675 | -0.171309 |
| 1  | 0 | 1.856421  | -5.007660 | -3.219971 |
| 1  | 0 | 0.330587  | -6.766161 | -2.339356 |

Se(SSCPh)<sub>2</sub> (**2d**)-*syn*

Total energy: -4528.4496801 hartrees

|    |   |          |           |           |
|----|---|----------|-----------|-----------|
| 34 | 0 | 0.000000 | 0.000000  | 0.835743  |
| 16 | 0 | 0.000000 | 1.583095  | -0.830491 |
| 6  | 0 | 0.000000 | 2.894471  | 0.304015  |
| 16 | 0 | 0.000000 | 2.566616  | 1.923769  |
| 6  | 0 | 0.000000 | 4.265367  | -0.268334 |
| 6  | 0 | 0.000000 | 4.480467  | -1.659876 |
| 6  | 0 | 0.000000 | 5.381691  | 0.588098  |
| 6  | 0 | 0.000000 | 5.776371  | -2.175095 |
| 6  | 0 | 0.000000 | 6.673157  | 0.065208  |
| 6  | 0 | 0.000000 | 6.879232  | -1.317546 |
| 1  | 0 | 0.000000 | 3.640751  | -2.351029 |
| 1  | 0 | 0.000000 | 5.229763  | 1.664006  |
| 1  | 0 | 0.000000 | 5.922794  | -3.252609 |
| 1  | 0 | 0.000000 | 7.523501  | 0.743050  |
| 1  | 0 | 0.000000 | 7.888528  | -1.722323 |
| 16 | 0 | 0.000000 | -1.583095 | -0.830491 |
| 6  | 0 | 0.000000 | -2.894471 | 0.304015  |
| 16 | 0 | 0.000000 | -2.566616 | 1.923769  |
| 6  | 0 | 0.000000 | -4.265367 | -0.268334 |
| 6  | 0 | 0.000000 | -4.480467 | -1.659876 |
| 6  | 0 | 0.000000 | -5.381691 | 0.588098  |
| 6  | 0 | 0.000000 | -5.776371 | -2.175095 |
| 6  | 0 | 0.000000 | -6.673157 | 0.065208  |
| 6  | 0 | 0.000000 | -6.879232 | -1.317546 |
| 1  | 0 | 0.000000 | -3.640751 | -2.351029 |
| 1  | 0 | 0.000000 | -5.229763 | 1.664006  |
| 1  | 0 | 0.000000 | -5.922794 | -3.252609 |
| 1  | 0 | 0.000000 | -7.523501 | 0.743050  |
| 1  | 0 | 0.000000 | -7.888528 | -1.722323 |

Se(SSCPh)<sub>2</sub> (**2d**)-*anti*

Total energy: -4528.4580218 hartrees

|    |   |           |          |          |
|----|---|-----------|----------|----------|
| 34 | 0 | 0.000000  | 0.000000 | 2.162288 |
| 16 | 0 | 0.509109  | 1.631329 | 0.774577 |
| 6  | 0 | -1.059492 | 2.242506 | 0.190665 |

|    |   |           |           |           |
|----|---|-----------|-----------|-----------|
| 16 | 0 | -2.505436 | 1.525187  | 0.379802  |
| 6  | 0 | -0.836637 | 3.481644  | -0.589923 |
| 6  | 0 | 0.000000  | 4.503165  | -0.102472 |
| 6  | 0 | -1.463864 | 3.636002  | -1.838850 |
| 6  | 0 | 0.183781  | 5.668911  | -0.848537 |
| 6  | 0 | -1.257377 | 4.794952  | -2.584924 |
| 6  | 0 | -0.433025 | 5.813631  | -2.093840 |
| 1  | 0 | 0.461759  | 4.405741  | 0.877319  |
| 1  | 0 | -2.104780 | 2.840657  | -2.211836 |
| 1  | 0 | 0.814163  | 6.463282  | -0.456053 |
| 1  | 0 | -1.737224 | 4.902608  | -3.554830 |
| 1  | 0 | -0.279628 | 6.719012  | -2.676282 |
| 16 | 0 | -0.509109 | -1.631329 | 0.774577  |
| 6  | 0 | 1.059492  | -2.242506 | 0.190665  |
| 16 | 0 | 2.505436  | -1.525187 | 0.379802  |
| 6  | 0 | 0.836637  | -3.481644 | -0.589923 |
| 6  | 0 | 0.000000  | -4.503165 | -0.102472 |
| 6  | 0 | 1.463864  | -3.636002 | -1.838850 |
| 6  | 0 | -0.183781 | -5.668911 | -0.848537 |
| 6  | 0 | 1.257377  | -4.794952 | -2.584924 |
| 6  | 0 | 0.433025  | -5.813631 | -2.093840 |
| 1  | 0 | -0.461759 | -4.405741 | 0.877319  |
| 1  | 0 | 2.104780  | -2.840657 | -2.211836 |
| 1  | 0 | -0.814163 | -6.463282 | -0.456053 |
| 1  | 0 | 1.737224  | -4.902608 | -3.554830 |
| 1  | 0 | 0.279628  | -6.719012 | -2.676282 |

Te(SSCPh)<sub>2</sub> (**3d**)-*syn*

Total energy: -8740.3097485 hartrees

|    |   |          |           |           |
|----|---|----------|-----------|-----------|
| 52 | 0 | 0.000000 | 0.000000  | 1.006658  |
| 16 | 0 | 0.000000 | 1.613121  | -0.868498 |
| 6  | 0 | 0.000000 | 2.977514  | 0.187237  |
| 16 | 0 | 0.000000 | 2.727558  | 1.830092  |
| 6  | 0 | 0.000000 | 4.326217  | -0.436682 |
| 6  | 0 | 0.000000 | 4.484112  | -1.836337 |
| 6  | 0 | 0.000000 | 5.476746  | 0.374409  |
| 6  | 0 | 0.000000 | 5.758091  | -2.403290 |
| 6  | 0 | 0.000000 | 6.745798  | -0.201278 |
| 6  | 0 | 0.000000 | 6.895193  | -1.591290 |
| 1  | 0 | 0.000000 | 3.614881  | -2.489615 |
| 1  | 0 | 0.000000 | 5.371634  | 1.456075  |
| 1  | 0 | 0.000000 | 5.860653  | -3.485895 |
| 1  | 0 | 0.000000 | 7.623341  | 0.441014  |
| 1  | 0 | 0.000000 | 7.887189  | -2.036805 |
| 16 | 0 | 0.000000 | -1.613121 | -0.868498 |
| 6  | 0 | 0.000000 | -2.977514 | 0.187237  |
| 16 | 0 | 0.000000 | -2.727558 | 1.830092  |
| 6  | 0 | 0.000000 | -4.326217 | -0.436682 |
| 6  | 0 | 0.000000 | -4.484112 | -1.836337 |
| 6  | 0 | 0.000000 | -5.476746 | 0.374409  |
| 6  | 0 | 0.000000 | -5.758091 | -2.403290 |

|   |   |          |           |           |
|---|---|----------|-----------|-----------|
| 6 | 0 | 0.000000 | -6.745798 | -0.201278 |
| 6 | 0 | 0.000000 | -6.895193 | -1.591290 |
| 1 | 0 | 0.000000 | -3.614881 | -2.489615 |
| 1 | 0 | 0.000000 | -5.371634 | 1.456075  |
| 1 | 0 | 0.000000 | -5.860653 | -3.485895 |
| 1 | 0 | 0.000000 | -7.623341 | 0.441014  |
| 1 | 0 | 0.000000 | -7.887189 | -2.036805 |

Te(SSCPh)<sub>2</sub> (**3d**)-*anti*

Total energy: -8740.2979421 hartrees

|    |   |           |           |           |
|----|---|-----------|-----------|-----------|
| 52 | 0 | 0.000000  | 0.000000  | 2.113893  |
| 16 | 0 | 0.699496  | 1.668463  | 0.589256  |
| 6  | 0 | -0.824808 | 2.386428  | -0.019696 |
| 16 | 0 | -2.310642 | 1.763253  | 0.194014  |
| 6  | 0 | -0.526481 | 3.588977  | -0.831758 |
| 6  | 0 | 0.386289  | 4.560530  | -0.379572 |
| 6  | 0 | -1.171683 | 3.765526  | -2.068961 |
| 6  | 0 | 0.633860  | 5.696577  | -1.152292 |
| 6  | 0 | -0.901265 | 4.893363  | -2.842075 |
| 6  | 0 | 0.000000  | 5.862140  | -2.386719 |
| 1  | 0 | 0.866692  | 4.445850  | 0.589499  |
| 1  | 0 | -1.871400 | 3.008382  | -2.414930 |
| 1  | 0 | 1.324955  | 6.453029  | -0.788055 |
| 1  | 0 | -1.393693 | 5.016566  | -3.803798 |
| 1  | 0 | 0.203251  | 6.743869  | -2.989837 |
| 16 | 0 | -0.699496 | -1.668463 | 0.589256  |
| 6  | 0 | 0.824808  | -2.386428 | -0.019696 |
| 16 | 0 | 2.310642  | -1.763253 | 0.194014  |
| 6  | 0 | 0.526481  | -3.588977 | -0.831758 |
| 6  | 0 | -0.386289 | -4.560530 | -0.379572 |
| 6  | 0 | 1.171683  | -3.765526 | -2.068961 |
| 6  | 0 | -0.633860 | -5.696577 | -1.152292 |
| 6  | 0 | 0.901265  | -4.893363 | -2.842075 |
| 6  | 0 | 0.000000  | -5.862140 | -2.386719 |
| 1  | 0 | -0.866692 | -4.445850 | 0.589499  |
| 1  | 0 | 1.871400  | -3.008382 | -2.414930 |
| 1  | 0 | -1.324955 | -6.453029 | -0.788055 |
| 1  | 0 | 1.393693  | -5.016566 | -3.803798 |
| 1  | 0 | -0.203251 | -6.743869 | -2.989837 |

S(SSCC<sub>6</sub>H<sub>4</sub>OMe-2)<sub>2</sub> (**4e**)-*syn*

Total energy: -2754.4739911 hartrees

|    |   |          |          |           |
|----|---|----------|----------|-----------|
| 16 | 0 | 0.000000 | 0.000000 | 1.335593  |
| 16 | 0 | 0.000000 | 1.498638 | -0.195671 |
| 6  | 0 | 0.000000 | 2.860966 | 0.897852  |
| 16 | 0 | 0.000000 | 2.596679 | 2.527056  |
| 6  | 0 | 0.000000 | 4.228580 | 0.302901  |
| 6  | 0 | 0.000000 | 4.495091 | -1.089173 |
| 6  | 0 | 0.000000 | 5.339518 | 1.167210  |
| 6  | 0 | 0.000000 | 5.809729 | -1.573011 |
| 6  | 0 | 0.000000 | 6.645809 | 0.690743  |

|    |   |           |           |           |
|----|---|-----------|-----------|-----------|
| 6  | 0 | 0.000000  | 6.883251  | -0.684689 |
| 1  | 0 | 0.000000  | 5.154064  | 2.236720  |
| 1  | 0 | 0.000000  | 6.002360  | -2.640424 |
| 1  | 0 | 0.000000  | 7.474978  | 1.393286  |
| 1  | 0 | 0.000000  | 7.899538  | -1.072076 |
| 8  | 0 | 0.000000  | 3.409909  | -1.908598 |
| 6  | 0 | 0.000000  | 3.605264  | -3.315204 |
| 1  | 0 | 0.000000  | 2.602074  | -3.740749 |
| 1  | 0 | 0.897234  | 4.143933  | -3.637323 |
| 1  | 0 | -0.897234 | 4.143933  | -3.637323 |
| 16 | 0 | 0.000000  | -1.498638 | -0.195671 |
| 6  | 0 | 0.000000  | -2.860966 | 0.897852  |
| 16 | 0 | 0.000000  | -2.596679 | 2.527056  |
| 6  | 0 | 0.000000  | -4.228580 | 0.302901  |
| 6  | 0 | 0.000000  | -4.495091 | -1.089173 |
| 6  | 0 | 0.000000  | -5.339518 | 1.167210  |
| 6  | 0 | 0.000000  | -5.809729 | -1.573011 |
| 6  | 0 | 0.000000  | -6.645809 | 0.690743  |
| 6  | 0 | 0.000000  | -6.883251 | -0.684689 |
| 1  | 0 | 0.000000  | -5.154064 | 2.236720  |
| 1  | 0 | 0.000000  | -6.002360 | -2.640424 |
| 1  | 0 | 0.000000  | -7.474978 | 1.393286  |
| 1  | 0 | 0.000000  | -7.899538 | -1.072076 |
| 8  | 0 | 0.000000  | -3.409909 | -1.908598 |
| 6  | 0 | 0.000000  | -3.605264 | -3.315204 |
| 1  | 0 | 0.000000  | -2.602074 | -3.740749 |
| 1  | 0 | 0.897234  | -4.143933 | -3.637323 |
| 1  | 0 | -0.897234 | -4.143933 | -3.637323 |

S(SSCC<sub>6</sub>H<sub>4</sub>OMe-2)<sub>2</sub> (**4e**)-*anti*

Total energy: -2754.5023544 hartrees

|    |   |           |           |           |
|----|---|-----------|-----------|-----------|
| 16 | 0 | 0.000000  | 0.000000  | 2.862998  |
| 16 | 0 | 0.695766  | 1.473630  | 1.590361  |
| 6  | 0 | -0.749001 | 2.182101  | 0.861375  |
| 16 | 0 | -2.298482 | 1.799112  | 1.154442  |
| 6  | 0 | -0.295885 | 3.208172  | -0.108105 |
| 6  | 0 | 0.395177  | 2.803195  | -1.267424 |
| 6  | 0 | -0.503178 | 4.572496  | 0.136817  |
| 6  | 0 | 0.900917  | 3.762298  | -2.151506 |
| 6  | 0 | 0.000000  | 5.527769  | -0.747303 |
| 6  | 0 | 0.708830  | 5.119879  | -1.881495 |
| 1  | 0 | -1.041808 | 4.870419  | 1.034216  |
| 1  | 0 | 1.424342  | 3.454463  | -3.052391 |
| 1  | 0 | -0.153046 | 6.585197  | -0.548103 |
| 1  | 0 | 1.103494  | 5.861324  | -2.572305 |
| 8  | 0 | 0.449430  | 1.458681  | -1.488430 |
| 6  | 0 | 1.658045  | 0.946790  | -2.048073 |
| 1  | 0 | 1.743834  | 1.191439  | -3.112490 |
| 1  | 0 | 2.523087  | 1.342449  | -1.504037 |
| 1  | 0 | 1.591701  | -0.133049 | -1.923996 |
| 16 | 0 | -0.695766 | -1.473630 | 1.590361  |

|    |   |           |           |           |
|----|---|-----------|-----------|-----------|
| 6  | 0 | 0.749001  | -2.182101 | 0.861375  |
| 16 | 0 | 2.298482  | -1.799112 | 1.154442  |
| 6  | 0 | 0.295885  | -3.208172 | -0.108105 |
| 6  | 0 | -0.395177 | -2.803195 | -1.267424 |
| 6  | 0 | 0.503178  | -4.572496 | 0.136817  |
| 6  | 0 | -0.900917 | -3.762298 | -2.151506 |
| 6  | 0 | 0.000000  | -5.527769 | -0.747303 |
| 6  | 0 | -0.708830 | -5.119879 | -1.881495 |
| 1  | 0 | 1.041808  | -4.870419 | 1.034216  |
| 1  | 0 | -1.424342 | -3.454463 | -3.052391 |
| 1  | 0 | 0.153046  | -6.585197 | -0.548103 |
| 1  | 0 | -1.103494 | -5.861324 | -2.572305 |
| 8  | 0 | -0.449430 | -1.458681 | -1.488430 |
| 6  | 0 | -1.658045 | -0.946790 | -2.048073 |
| 1  | 0 | -1.743834 | -1.191439 | -3.112490 |
| 1  | 0 | -2.523087 | -1.342449 | -1.504037 |
| 1  | 0 | -1.591701 | 0.133049  | -1.923996 |

Se(SSCC<sub>6</sub>H<sub>4</sub>OMe-2)<sub>2</sub> (**2e**)-*syn*

Total energy: -4756.9002324 hartrees

|    |   |           |           |           |
|----|---|-----------|-----------|-----------|
| 34 | 0 | 0.000000  | 0.000000  | 1.310629  |
| 16 | 0 | 0.000000  | 1.570670  | -0.358627 |
| 6  | 0 | 0.000000  | 2.916122  | 0.738448  |
| 16 | 0 | 0.000000  | 2.615064  | 2.369406  |
| 6  | 0 | 0.000000  | 4.299305  | 0.183801  |
| 6  | 0 | 0.000000  | 4.603724  | -1.201435 |
| 6  | 0 | 0.000000  | 5.385843  | 1.079425  |
| 6  | 0 | 0.000000  | 5.932634  | -1.645816 |
| 6  | 0 | 0.000000  | 6.705037  | 0.640284  |
| 6  | 0 | 0.000000  | 6.980891  | -0.727940 |
| 1  | 0 | 0.000000  | 5.172823  | 2.143979  |
| 1  | 0 | 0.000000  | 6.156201  | -2.707149 |
| 1  | 0 | 0.000000  | 7.514072  | 1.365943  |
| 1  | 0 | 0.000000  | 8.007597  | -1.086837 |
| 8  | 0 | 0.000000  | 3.544627  | -2.053191 |
| 6  | 0 | 0.000000  | 3.785050  | -3.452927 |
| 1  | 0 | 0.000000  | 2.795899  | -3.909968 |
| 1  | 0 | 0.897162  | 4.333617  | -3.758318 |
| 1  | 0 | -0.897162 | 4.333617  | -3.758318 |
| 16 | 0 | 0.000000  | -1.570670 | -0.358627 |
| 6  | 0 | 0.000000  | -2.916122 | 0.738448  |
| 16 | 0 | 0.000000  | -2.615064 | 2.369406  |
| 6  | 0 | 0.000000  | -4.299305 | 0.183801  |
| 6  | 0 | 0.000000  | -4.603724 | -1.201435 |
| 6  | 0 | 0.000000  | -5.385843 | 1.079425  |
| 6  | 0 | 0.000000  | -5.932634 | -1.645816 |
| 6  | 0 | 0.000000  | -6.705037 | 0.640284  |
| 6  | 0 | 0.000000  | -6.980891 | -0.727940 |
| 1  | 0 | 0.000000  | -5.172823 | 2.143979  |
| 1  | 0 | 0.000000  | -6.156201 | -2.707149 |
| 1  | 0 | 0.000000  | -7.514072 | 1.365943  |

|   |   |           |           |           |
|---|---|-----------|-----------|-----------|
| 1 | 0 | 0.000000  | -8.007597 | -1.086837 |
| 8 | 0 | 0.000000  | -3.544627 | -2.053191 |
| 6 | 0 | 0.000000  | -3.785050 | -3.452927 |
| 1 | 0 | 0.000000  | -2.795899 | -3.909968 |
| 1 | 0 | 0.897162  | -4.333617 | -3.758318 |
| 1 | 0 | -0.897162 | -4.333617 | -3.758318 |

Se(SSCC<sub>6</sub>H<sub>4</sub>OMe-2)<sub>2</sub> (**2e**)-*anti*

Total energy: -4756.9164138 hartrees

|    |   |           |           |           |
|----|---|-----------|-----------|-----------|
| 34 | 0 | 0.000000  | 0.000000  | 3.034434  |
| 16 | 0 | 0.477363  | 1.638693  | 1.623173  |
| 6  | 0 | -0.959822 | 1.880812  | 0.637805  |
| 16 | 0 | -2.416785 | 1.181147  | 0.806103  |
| 6  | 0 | -0.618674 | 2.841293  | -0.444189 |
| 6  | 0 | 0.285146  | 2.470655  | -1.467231 |
| 6  | 0 | -1.203441 | 4.113111  | -0.462835 |
| 6  | 0 | 0.586581  | 3.381131  | -2.487586 |
| 6  | 0 | -0.894235 | 5.021771  | -1.477117 |
| 6  | 0 | 0.000000  | 4.651335  | -2.482583 |
| 1  | 0 | -1.899893 | 4.378228  | 0.330238  |
| 1  | 0 | 1.274542  | 3.113652  | -3.283351 |
| 1  | 0 | -1.348027 | 6.009226  | -1.480186 |
| 1  | 0 | 0.246700  | 5.350693  | -3.278187 |
| 8  | 0 | 0.769032  | 1.205729  | -1.386672 |
| 6  | 0 | 1.623341  | 0.746802  | -2.421357 |
| 1  | 0 | 1.119113  | 0.780573  | -3.394919 |
| 1  | 0 | 2.548852  | 1.332710  | -2.463738 |
| 1  | 0 | 1.855887  | -0.285234 | -2.159716 |
| 16 | 0 | -0.477363 | -1.638693 | 1.623173  |
| 6  | 0 | 0.959822  | -1.880812 | 0.637805  |
| 16 | 0 | 2.416785  | -1.181147 | 0.806103  |
| 6  | 0 | 0.618674  | -2.841293 | -0.444189 |
| 6  | 0 | -0.285146 | -2.470655 | -1.467231 |
| 6  | 0 | 1.203441  | -4.113111 | -0.462835 |
| 6  | 0 | -0.586581 | -3.381131 | -2.487586 |
| 6  | 0 | 0.894235  | -5.021771 | -1.477117 |
| 6  | 0 | 0.000000  | -4.651335 | -2.482583 |
| 1  | 0 | 1.899893  | -4.378228 | 0.330238  |
| 1  | 0 | -1.274542 | -3.113652 | -3.283351 |
| 1  | 0 | 1.348027  | -6.009226 | -1.480186 |
| 1  | 0 | -0.246700 | -5.350693 | -3.278187 |
| 8  | 0 | -0.769032 | -1.205729 | -1.386672 |
| 6  | 0 | -1.623341 | -0.746802 | -2.421357 |
| 1  | 0 | -1.119113 | -0.780573 | -3.394919 |
| 1  | 0 | -2.548852 | -1.332710 | -2.463738 |
| 1  | 0 | -1.855887 | 0.285234  | -2.159716 |

Te(SSCC<sub>6</sub>H<sub>4</sub>OMe-2)<sub>2</sub> (**3e**)-*syn*

Total energy: -8968.7560914 hartrees

|    |   |          |          |           |
|----|---|----------|----------|-----------|
| 52 | 0 | 0.000000 | 0.000000 | 1.446993  |
| 16 | 0 | 0.000000 | 1.602017 | -0.433335 |



|    |   |           |           |           |
|----|---|-----------|-----------|-----------|
| 6  | 0 | 0.000000  | 2.989310  | 0.593320  |
| 16 | 0 | 0.000000  | 2.740265  | 2.244331  |
| 6  | 0 | 0.000000  | 4.357958  | 0.005906  |
| 6  | 0 | 0.000000  | 4.630848  | -1.387972 |
| 6  | 0 | 0.000000  | 5.465369  | 0.877461  |
| 6  | 0 | 0.000000  | 5.951624  | -1.857537 |
| 6  | 0 | 0.000000  | 6.774780  | 0.410314  |
| 6  | 0 | 0.000000  | 7.020219  | -0.963484 |
| 1  | 0 | 0.000000  | 5.279392  | 1.947258  |
| 1  | 0 | 0.000000  | 6.153347  | -2.923180 |
| 1  | 0 | 0.000000  | 7.599317  | 1.118320  |
| 1  | 0 | 0.000000  | 8.038616  | -1.345380 |
| 8  | 0 | 0.000000  | 3.558560  | -2.221290 |
| 6  | 0 | 0.000000  | 3.777928  | -3.624645 |
| 1  | 0 | 0.000000  | 2.781510  | -4.065685 |
| 1  | 0 | 0.897086  | 4.321455  | -3.939474 |
| 1  | 0 | -0.897086 | 4.321455  | -3.939474 |
| 16 | 0 | 0.000000  | -1.602017 | -0.433335 |
| 6  | 0 | 0.000000  | -2.989310 | 0.593320  |
| 16 | 0 | 0.000000  | -2.740265 | 2.244331  |
| 6  | 0 | 0.000000  | -4.357958 | 0.005906  |
| 6  | 0 | 0.000000  | -4.630848 | -1.387972 |
| 6  | 0 | 0.000000  | -5.465369 | 0.877461  |
| 6  | 0 | 0.000000  | -5.951624 | -1.857537 |
| 6  | 0 | 0.000000  | -6.774780 | 0.410314  |
| 6  | 0 | 0.000000  | -7.020219 | -0.963484 |
| 1  | 0 | 0.000000  | -5.279392 | 1.947258  |
| 1  | 0 | 0.000000  | -6.153347 | -2.923180 |
| 1  | 0 | 0.000000  | -7.599317 | 1.118320  |
| 1  | 0 | 0.000000  | -8.038616 | -1.345380 |
| 8  | 0 | 0.000000  | -3.558560 | -2.221290 |
| 6  | 0 | 0.000000  | -3.777928 | -3.624645 |
| 1  | 0 | 0.000000  | -2.781510 | -4.065685 |
| 1  | 0 | 0.897086  | -4.321455 | -3.939474 |
| 1  | 0 | -0.897086 | -4.321455 | -3.939474 |

Te(SSCC<sub>6</sub>H<sub>4</sub>OMe-2)<sub>2</sub> (**3e**)-*anti*

Total energy: -8968.7543828 hartrees

|    |   |           |          |           |
|----|---|-----------|----------|-----------|
| 52 | 0 | 0.000000  | 0.000000 | 2.849387  |
| 16 | 0 | 0.538955  | 1.722641 | 1.306892  |
| 6  | 0 | -0.947404 | 2.023998 | 0.388945  |
| 16 | 0 | -2.393869 | 1.320776 | 0.605955  |
| 6  | 0 | -0.644489 | 3.026481 | -0.664738 |
| 6  | 0 | 0.162343  | 2.655942 | -1.762790 |
| 6  | 0 | -1.134538 | 4.333829 | -0.568559 |
| 6  | 0 | 0.484440  | 3.605465 | -2.739264 |
| 6  | 0 | -0.811238 | 5.279985 | -1.544148 |
| 6  | 0 | 0.000000  | 4.912869 | -2.619513 |
| 1  | 0 | -1.758105 | 4.599298 | 0.283038  |
| 1  | 0 | 1.099640  | 3.336772 | -3.592537 |
| 1  | 0 | -1.187218 | 6.296307 | -1.461443 |

|    |   |           |           |           |
|----|---|-----------|-----------|-----------|
| 1  | 0 | 0.257109  | 5.644244  | -3.382298 |
| 8  | 0 | 0.523678  | 1.347060  | -1.795564 |
| 6  | 0 | 1.531670  | 0.954991  | -2.716076 |
| 1  | 0 | 1.175956  | 1.025791  | -3.751145 |
| 1  | 0 | 2.433321  | 1.565637  | -2.591434 |
| 1  | 0 | 1.747277  | -0.084630 | -2.472410 |
| 16 | 0 | -0.538955 | -1.722641 | 1.306892  |
| 6  | 0 | 0.947404  | -2.023998 | 0.388945  |
| 16 | 0 | 2.393869  | -1.320776 | 0.605955  |
| 6  | 0 | 0.644489  | -3.026481 | -0.664738 |
| 6  | 0 | -0.162343 | -2.655942 | -1.762790 |
| 6  | 0 | 1.134538  | -4.333829 | -0.568559 |
| 6  | 0 | -0.484440 | -3.605465 | -2.739264 |
| 6  | 0 | 0.811238  | -5.279985 | -1.544148 |
| 6  | 0 | 0.000000  | -4.912869 | -2.619513 |
| 1  | 0 | 1.758105  | -4.599298 | 0.283038  |
| 1  | 0 | -1.099640 | -3.336772 | -3.592537 |
| 1  | 0 | 1.187218  | -6.296307 | -1.461443 |
| 1  | 0 | -0.257109 | -5.644244 | -3.382298 |
| 8  | 0 | -0.523678 | -1.347060 | -1.795564 |
| 6  | 0 | -1.531670 | -0.954991 | -2.716076 |
| 1  | 0 | -1.175956 | -1.025791 | -3.751145 |
| 1  | 0 | -2.433321 | -1.565637 | -2.591434 |
| 1  | 0 | -1.747277 | 0.084630  | -2.472410 |

O(SOCMe)<sub>2</sub> (**13**)-*syn*

Total energy: -1175.9749332 hartrees

|    |   |           |           |           |
|----|---|-----------|-----------|-----------|
| 8  | 0 | 0.000000  | 0.000000  | 0.060603  |
| 16 | 0 | 0.000000  | 1.399954  | -0.918246 |
| 6  | 0 | 0.000000  | 2.573058  | 0.433346  |
| 8  | 0 | 0.000000  | 2.238531  | 1.592271  |
| 6  | 0 | 0.000000  | 3.999670  | -0.064573 |
| 1  | 0 | 0.000000  | 4.062374  | -1.156860 |
| 1  | 0 | 0.887501  | 4.502959  | 0.327789  |
| 1  | 0 | -0.887501 | 4.502959  | 0.327789  |
| 16 | 0 | 0.000000  | -1.399954 | -0.918246 |
| 6  | 0 | 0.000000  | -2.573058 | 0.433346  |
| 8  | 0 | 0.000000  | -2.238531 | 1.592271  |
| 6  | 0 | 0.000000  | -3.999670 | -0.064573 |
| 1  | 0 | 0.000000  | -4.062374 | -1.156860 |
| 1  | 0 | 0.887501  | -4.502959 | 0.327789  |
| 1  | 0 | -0.887501 | -4.502959 | 0.327789  |

O(SOCMe)<sub>2</sub> (**13**)-*anti*

Total energy: -1175.9957708 hartrees

|    |   |           |          |           |
|----|---|-----------|----------|-----------|
| 8  | 0 | 0.000000  | 0.000000 | 1.116059  |
| 16 | 0 | 0.866744  | 1.150304 | 0.246710  |
| 6  | 0 | -0.470781 | 2.263506 | -0.162534 |
| 8  | 0 | -1.625464 | 2.012551 | 0.102817  |
| 6  | 0 | 0.000000  | 3.516394 | -0.861642 |
| 1  | 0 | -0.178938 | 4.369282 | -0.200732 |

|    |   |           |           |           |
|----|---|-----------|-----------|-----------|
| 1  | 0 | 1.063205  | 3.477585  | -1.116857 |
| 1  | 0 | -0.589953 | 3.651850  | -1.771482 |
| 16 | 0 | -0.866744 | -1.150304 | 0.246710  |
| 6  | 0 | 0.470781  | -2.263506 | -0.162534 |
| 8  | 0 | 1.625464  | -2.012551 | 0.102817  |
| 6  | 0 | 0.000000  | -3.516394 | -0.861642 |
| 1  | 0 | 0.178938  | -4.369282 | -0.200732 |
| 1  | 0 | -1.063205 | -3.477585 | -1.116857 |
| 1  | 0 | 0.589953  | -3.651850 | -1.771482 |

S(SOCMe)<sub>2</sub> (**7a**)-*syn*

Total energy: -1498.6180248 hartrees

|    |   |           |           |           |
|----|---|-----------|-----------|-----------|
| 16 | 0 | 0.000000  | 0.000000  | 0.567405  |
| 16 | 0 | 0.000000  | 1.527776  | -0.902399 |
| 6  | 0 | 0.000000  | 2.864929  | 0.278642  |
| 8  | 0 | 0.000000  | 2.665952  | 1.475710  |
| 6  | 0 | 0.000000  | 4.235178  | -0.353174 |
| 1  | 0 | 0.886210  | 4.774292  | -0.007425 |
| 1  | 0 | 0.000000  | 4.191731  | -1.444498 |
| 1  | 0 | -0.886210 | 4.774292  | -0.007425 |
| 16 | 0 | 0.000000  | -1.527776 | -0.902399 |
| 6  | 0 | 0.000000  | -2.864929 | 0.278642  |
| 8  | 0 | 0.000000  | -2.665952 | 1.475710  |
| 6  | 0 | 0.000000  | -4.235178 | -0.353174 |
| 1  | 0 | 0.886210  | -4.774292 | -0.007425 |
| 1  | 0 | 0.000000  | -4.191731 | -1.444498 |
| 1  | 0 | -0.886210 | -4.774292 | -0.007425 |

S(SOCMe)<sub>2</sub> (**7a**)-*anti*

Total energy: -1498.6380838 hartrees

|    |   |           |           |           |
|----|---|-----------|-----------|-----------|
| 16 | 0 | 0.000000  | 0.000000  | 1.349654  |
| 16 | 0 | 0.925683  | 1.355864  | 0.102327  |
| 6  | 0 | -0.460343 | 2.451484  | -0.324697 |
| 8  | 0 | -1.603036 | 2.227408  | -0.007514 |
| 6  | 0 | 0.000000  | 3.662089  | -1.099213 |
| 1  | 0 | 0.330049  | 4.429360  | -0.391371 |
| 1  | 0 | 0.835956  | 3.421097  | -1.761125 |
| 1  | 0 | -0.840943 | 4.048183  | -1.678391 |
| 16 | 0 | -0.925683 | -1.355864 | 0.102327  |
| 6  | 0 | 0.460343  | -2.451484 | -0.324697 |
| 8  | 0 | 1.603036  | -2.227408 | -0.007514 |
| 6  | 0 | 0.000000  | -3.662089 | -1.099213 |
| 1  | 0 | -0.330049 | -4.429360 | -0.391371 |
| 1  | 0 | -0.835956 | -3.421097 | -1.761125 |
| 1  | 0 | 0.840943  | -4.048183 | -1.678391 |

Se(SOCMe)<sub>2</sub> (**5a**)-*syn*

Total energy: -3501.0401046 hartrees

|    |   |          |          |           |
|----|---|----------|----------|-----------|
| 34 | 0 | 0.000000 | 0.000000 | 0.544509  |
| 16 | 0 | 0.000000 | 1.602919 | -1.045602 |
| 6  | 0 | 0.000000 | 2.914813 | 0.154155  |

|    |   |           |           |           |
|----|---|-----------|-----------|-----------|
| 8  | 0 | 0.000000  | 2.684768  | 1.349596  |
| 6  | 0 | 0.000000  | 4.305459  | -0.431638 |
| 1  | 0 | 0.000000  | 4.298332  | -1.523462 |
| 1  | 0 | 0.885998  | 4.832995  | -0.067707 |
| 1  | 0 | -0.885998 | 4.832995  | -0.067707 |
| 16 | 0 | 0.000000  | -1.602919 | -1.045602 |
| 6  | 0 | 0.000000  | -2.914813 | 0.154155  |
| 8  | 0 | 0.000000  | -2.684768 | 1.349596  |
| 6  | 0 | 0.000000  | -4.305459 | -0.431638 |
| 1  | 0 | 0.000000  | -4.298332 | -1.523462 |
| 1  | 0 | 0.885998  | -4.832995 | -0.067707 |
| 1  | 0 | -0.885998 | -4.832995 | -0.067707 |

Se(SOCMe)<sub>2</sub> (**5a**)-*anti*

Total energy: -3501.0532058 hartrees

|    |   |           |           |           |
|----|---|-----------|-----------|-----------|
| 34 | 0 | 0.000000  | 0.000000  | 1.247373  |
| 16 | 0 | 0.000000  | 1.715227  | -0.129703 |
| 6  | 0 | -1.757691 | 1.817338  | -0.597166 |
| 8  | 0 | -2.582643 | 0.996857  | -0.278965 |
| 6  | 0 | -2.039541 | 3.054712  | -1.416327 |
| 1  | 0 | -2.125730 | 3.914615  | -0.744364 |
| 1  | 0 | -1.232752 | 3.253717  | -2.126672 |
| 1  | 0 | -2.983447 | 2.914657  | -1.946376 |
| 16 | 0 | 0.000000  | -1.715227 | -0.129703 |
| 6  | 0 | 1.757691  | -1.817338 | -0.597166 |
| 8  | 0 | 2.582643  | -0.996857 | -0.278965 |
| 6  | 0 | 2.039541  | -3.054712 | -1.416327 |
| 1  | 0 | 2.125730  | -3.914615 | -0.744364 |
| 1  | 0 | 1.232752  | -3.253717 | -2.126672 |
| 1  | 0 | 2.983447  | -2.914657 | -1.946376 |

Te(SOCMe)<sub>2</sub> (**6a**)-*syn*

Total energy: -7712.8862231 hartrees

|    |   |           |           |           |
|----|---|-----------|-----------|-----------|
| 52 | 0 | 0.000000  | 0.000000  | 0.556116  |
| 16 | 0 | 0.000000  | 1.673699  | -1.220577 |
| 6  | 0 | 0.000000  | 2.937381  | 0.007752  |
| 8  | 0 | 0.000000  | 2.640269  | 1.199731  |
| 6  | 0 | 0.000000  | 4.365312  | -0.476411 |
| 1  | 0 | 0.885496  | 4.866616  | -0.075077 |
| 1  | 0 | 0.000000  | 4.433813  | -1.565546 |
| 1  | 0 | -0.885496 | 4.866616  | -0.075077 |
| 16 | 0 | 0.000000  | -1.673699 | -1.220577 |
| 6  | 0 | 0.000000  | -2.937381 | 0.007752  |
| 8  | 0 | 0.000000  | -2.640269 | 1.199731  |
| 6  | 0 | 0.000000  | -4.365312 | -0.476411 |
| 1  | 0 | 0.885496  | -4.866616 | -0.075077 |
| 1  | 0 | 0.000000  | -4.433813 | -1.565546 |
| 1  | 0 | -0.885496 | -4.866616 | -0.075077 |

Te(SOCMe)<sub>2</sub> (**6a**)-*anti*

Total energy: -7712.8905401 hartrees

|    |   |           |           |           |
|----|---|-----------|-----------|-----------|
| 52 | 0 | 0.000000  | 0.000000  | 1.155466  |
| 16 | 0 | 0.000000  | 1.814487  | -0.362598 |
| 6  | 0 | -1.773142 | 1.922115  | -0.809199 |
| 8  | 0 | -2.601051 | 1.129061  | -0.435385 |
| 6  | 0 | -2.046462 | 3.113417  | -1.696608 |
| 1  | 0 | -1.887882 | 4.036359  | -1.130265 |
| 1  | 0 | -1.363336 | 3.118229  | -2.550798 |
| 1  | 0 | -3.080761 | 3.063526  | -2.041554 |
| 16 | 0 | 0.000000  | -1.814487 | -0.362598 |
| 6  | 0 | 1.773142  | -1.922115 | -0.809199 |
| 8  | 0 | 2.601051  | -1.129061 | -0.435385 |
| 6  | 0 | 2.046462  | -3.113417 | -1.696608 |
| 1  | 0 | 1.887882  | -4.036359 | -1.130265 |
| 1  | 0 | 1.363336  | -3.118229 | -2.550798 |
| 1  | 0 | 3.080761  | -3.063526 | -2.041554 |

S(SOCPh)<sub>2</sub> (**7d**)-*syn*

Total energy: -1880.8782175 hartrees

|    |   |          |           |           |
|----|---|----------|-----------|-----------|
| 16 | 0 | 0.000000 | 0.000000  | 0.909247  |
| 16 | 0 | 0.000000 | 1.515413  | -0.576746 |
| 6  | 0 | 0.000000 | 2.841148  | 0.629921  |
| 8  | 0 | 0.000000 | 2.586795  | 1.821442  |
| 6  | 0 | 0.000000 | 4.221752  | 0.077332  |
| 6  | 0 | 0.000000 | 4.486893  | -1.300624 |
| 6  | 0 | 0.000000 | 5.282219  | 0.996767  |
| 6  | 0 | 0.000000 | 5.807099  | -1.751546 |
| 6  | 0 | 0.000000 | 6.597825  | 0.536547  |
| 6  | 0 | 0.000000 | 6.863911  | -0.836498 |
| 1  | 0 | 0.000000 | 3.676698  | -2.026841 |
| 1  | 0 | 0.000000 | 5.058396  | 2.060061  |
| 1  | 0 | 0.000000 | 6.010423  | -2.819505 |
| 1  | 0 | 0.000000 | 7.418169  | 1.250100  |
| 1  | 0 | 0.000000 | 7.891318  | -1.192778 |
| 16 | 0 | 0.000000 | -1.515413 | -0.576746 |
| 6  | 0 | 0.000000 | -2.841148 | 0.629921  |
| 8  | 0 | 0.000000 | -2.586795 | 1.821442  |
| 6  | 0 | 0.000000 | -4.221752 | 0.077332  |
| 6  | 0 | 0.000000 | -4.486893 | -1.300624 |
| 6  | 0 | 0.000000 | -5.282219 | 0.996767  |
| 6  | 0 | 0.000000 | -5.807099 | -1.751546 |
| 6  | 0 | 0.000000 | -6.597825 | 0.536547  |
| 6  | 0 | 0.000000 | -6.863911 | -0.836498 |
| 1  | 0 | 0.000000 | -3.676698 | -2.026841 |
| 1  | 0 | 0.000000 | -5.058396 | 2.060061  |
| 1  | 0 | 0.000000 | -6.010423 | -2.819505 |
| 1  | 0 | 0.000000 | -7.418169 | 1.250100  |
| 1  | 0 | 0.000000 | -7.891318 | -1.192778 |

S(SOCPh)<sub>2</sub> (**7d**)-*anti*

Total energy: -1880.9009239 hartrees

|    |   |          |          |          |
|----|---|----------|----------|----------|
| 16 | 0 | 0.000000 | 0.000000 | 2.213812 |
|----|---|----------|----------|----------|

|    |   |           |           |           |
|----|---|-----------|-----------|-----------|
| 16 | 0 | 0.536802  | 1.547709  | 0.961723  |
| 6  | 0 | -1.101562 | 2.203122  | 0.521227  |
| 8  | 0 | -2.130818 | 1.616972  | 0.774805  |
| 6  | 0 | -1.028469 | 3.469708  | -0.251329 |
| 6  | 0 | 0.000000  | 4.404260  | -0.052637 |
| 6  | 0 | -2.033732 | 3.714273  | -1.200005 |
| 6  | 0 | 0.015741  | 5.580800  | -0.804326 |
| 6  | 0 | -2.002182 | 4.887038  | -1.952536 |
| 6  | 0 | -0.977130 | 5.819779  | -1.758626 |
| 1  | 0 | 0.758670  | 4.234490  | 0.707734  |
| 1  | 0 | -2.824509 | 2.980337  | -1.333727 |
| 1  | 0 | 0.803634  | 6.312214  | -0.642282 |
| 1  | 0 | -2.775433 | 5.074491  | -2.693600 |
| 1  | 0 | -0.957184 | 6.735213  | -2.345227 |
| 16 | 0 | -0.536802 | -1.547709 | 0.961723  |
| 6  | 0 | 1.101562  | -2.203122 | 0.521227  |
| 8  | 0 | 2.130818  | -1.616972 | 0.774805  |
| 6  | 0 | 1.028469  | -3.469708 | -0.251329 |
| 6  | 0 | 0.000000  | -4.404260 | -0.052637 |
| 6  | 0 | 2.033732  | -3.714273 | -1.200005 |
| 6  | 0 | -0.015741 | -5.580800 | -0.804326 |
| 6  | 0 | 2.002182  | -4.887038 | -1.952536 |
| 6  | 0 | 0.977130  | -5.819779 | -1.758626 |
| 1  | 0 | -0.758670 | -4.234490 | 0.707734  |
| 1  | 0 | 2.824509  | -2.980337 | -1.333727 |
| 1  | 0 | -0.803634 | -6.312214 | -0.642282 |
| 1  | 0 | 2.775433  | -5.074491 | -2.693600 |
| 1  | 0 | 0.957184  | -6.735213 | -2.345227 |

Se(SOCPh)<sub>2</sub> (**5d**)-*syn*

Total energy: -3883.3007571 hartrees

|    |   |          |           |           |
|----|---|----------|-----------|-----------|
| 34 | 0 | 0.000000 | 0.000000  | 0.864097  |
| 16 | 0 | 0.000000 | 1.591163  | -0.740838 |
| 6  | 0 | 0.000000 | 2.890923  | 0.482604  |
| 8  | 0 | 0.000000 | 2.607981  | 1.672231  |
| 6  | 0 | 0.000000 | 4.287214  | -0.027934 |
| 6  | 0 | 0.000000 | 4.590935  | -1.398005 |
| 6  | 0 | 0.000000 | 5.321366  | 0.921357  |
| 6  | 0 | 0.000000 | 5.923288  | -1.811407 |
| 6  | 0 | 0.000000 | 6.649321  | 0.498058  |
| 6  | 0 | 0.000000 | 6.954017  | -0.866971 |
| 1  | 0 | 0.000000 | 3.800185  | -2.145343 |
| 1  | 0 | 0.000000 | 5.068247  | 1.978074  |
| 1  | 0 | 0.000000 | 6.156804  | -2.873196 |
| 1  | 0 | 0.000000 | 7.449373  | 1.234322  |
| 1  | 0 | 0.000000 | 7.991071  | -1.194145 |
| 16 | 0 | 0.000000 | -1.591163 | -0.740838 |
| 6  | 0 | 0.000000 | -2.890923 | 0.482604  |
| 8  | 0 | 0.000000 | -2.607981 | 1.672231  |
| 6  | 0 | 0.000000 | -4.287214 | -0.027934 |
| 6  | 0 | 0.000000 | -4.590935 | -1.398005 |

|   |   |          |           |           |
|---|---|----------|-----------|-----------|
| 6 | 0 | 0.000000 | -5.321366 | 0.921357  |
| 6 | 0 | 0.000000 | -5.923288 | -1.811407 |
| 6 | 0 | 0.000000 | -6.649321 | 0.498058  |
| 6 | 0 | 0.000000 | -6.954017 | -0.866971 |
| 1 | 0 | 0.000000 | -3.800185 | -2.145343 |
| 1 | 0 | 0.000000 | -5.068247 | 1.978074  |
| 1 | 0 | 0.000000 | -6.156804 | -2.873196 |
| 1 | 0 | 0.000000 | -7.449373 | 1.234322  |
| 1 | 0 | 0.000000 | -7.991071 | -1.194145 |

Se(SOCPh)<sub>2</sub> (**5d**)-*anti*

Total energy: -3883.3152784 hartrees

|    |   |           |           |           |
|----|---|-----------|-----------|-----------|
| 34 | 0 | 0.000000  | 0.000000  | 2.170523  |
| 16 | 0 | 0.810716  | 1.507769  | 0.787734  |
| 6  | 0 | -0.708123 | 2.382934  | 0.290945  |
| 8  | 0 | -1.819393 | 1.970834  | 0.538282  |
| 6  | 0 | -0.429067 | 3.593300  | -0.526751 |
| 6  | 0 | 0.722275  | 4.373384  | -0.336618 |
| 6  | 0 | -1.367797 | 3.943652  | -1.510130 |
| 6  | 0 | 0.926855  | 5.503071  | -1.131090 |
| 6  | 0 | -1.147406 | 5.066958  | -2.305325 |
| 6  | 0 | 0.000000  | 5.846238  | -2.119408 |
| 1  | 0 | 1.432812  | 4.123239  | 0.447553  |
| 1  | 0 | -2.256072 | 3.329740  | -1.636695 |
| 1  | 0 | 1.811315  | 6.116229  | -0.976844 |
| 1  | 0 | -1.868881 | 5.335303  | -3.073266 |
| 1  | 0 | 0.167299  | 6.723849  | -2.739371 |
| 16 | 0 | -0.810716 | -1.507769 | 0.787734  |
| 6  | 0 | 0.708123  | -2.382934 | 0.290945  |
| 8  | 0 | 1.819393  | -1.970834 | 0.538282  |
| 6  | 0 | 0.429067  | -3.593300 | -0.526751 |
| 6  | 0 | -0.722275 | -4.373384 | -0.336618 |
| 6  | 0 | 1.367797  | -3.943652 | -1.510130 |
| 6  | 0 | -0.926855 | -5.503071 | -1.131090 |
| 6  | 0 | 1.147406  | -5.066958 | -2.305325 |
| 6  | 0 | 0.000000  | -5.846238 | -2.119408 |
| 1  | 0 | -1.432812 | -4.123239 | 0.447553  |
| 1  | 0 | 2.256072  | -3.329740 | -1.636695 |
| 1  | 0 | -1.811315 | -6.116229 | -0.976844 |
| 1  | 0 | 1.868881  | -5.335303 | -3.073266 |
| 1  | 0 | -0.167299 | -6.723849 | -2.739371 |

Te(SOCPh)<sub>2</sub> (**6d**)-*syn*

Total energy: -8095.1497105 hartrees

|    |   |          |          |           |
|----|---|----------|----------|-----------|
| 52 | 0 | 0.000000 | 0.000000 | 0.845125  |
| 16 | 0 | 0.000000 | 1.660247 | -0.946566 |
| 6  | 0 | 0.000000 | 2.917070 | 0.294664  |
| 8  | 0 | 0.000000 | 2.581745 | 1.482918  |
| 6  | 0 | 0.000000 | 4.337788 | -0.134511 |
| 6  | 0 | 0.000000 | 4.712560 | -1.487451 |
| 6  | 0 | 0.000000 | 5.320870 | 0.868608  |

|    |   |          |           |           |
|----|---|----------|-----------|-----------|
| 6  | 0 | 0.000000 | 6.064674  | -1.830081 |
| 6  | 0 | 0.000000 | 6.669052  | 0.514794  |
| 6  | 0 | 0.000000 | 7.044538  | -0.832643 |
| 1  | 0 | 0.000000 | 3.957967  | -2.271148 |
| 1  | 0 | 0.000000 | 5.012986  | 1.910840  |
| 1  | 0 | 0.000000 | 6.353836  | -2.878119 |
| 1  | 0 | 0.000000 | 7.429855  | 1.291590  |
| 1  | 0 | 0.000000 | 8.097353  | -1.104975 |
| 16 | 0 | 0.000000 | -1.660247 | -0.946566 |
| 6  | 0 | 0.000000 | -2.917070 | 0.294664  |
| 8  | 0 | 0.000000 | -2.581745 | 1.482918  |
| 6  | 0 | 0.000000 | -4.337788 | -0.134511 |
| 6  | 0 | 0.000000 | -4.712560 | -1.487451 |
| 6  | 0 | 0.000000 | -5.320870 | 0.868608  |
| 6  | 0 | 0.000000 | -6.064674 | -1.830081 |
| 6  | 0 | 0.000000 | -6.669052 | 0.514794  |
| 6  | 0 | 0.000000 | -7.044538 | -0.832643 |
| 1  | 0 | 0.000000 | -3.957967 | -2.271148 |
| 1  | 0 | 0.000000 | -5.012986 | 1.910840  |
| 1  | 0 | 0.000000 | -6.353836 | -2.878119 |
| 1  | 0 | 0.000000 | -7.429855 | 1.291590  |
| 1  | 0 | 0.000000 | -8.097353 | -1.104975 |

Te(SOCPh)<sub>2</sub> (**6d**)-*anti*

Total energy: -8095.1526333 hartrees

|    |   |           |           |           |
|----|---|-----------|-----------|-----------|
| 52 | 0 | 0.000000  | 0.000000  | 2.103752  |
| 16 | 0 | 0.000000  | 1.807794  | 0.576963  |
| 6  | 0 | -1.763029 | 1.841206  | 0.087724  |
| 8  | 0 | -2.540329 | 0.961694  | 0.385139  |
| 6  | 0 | -2.108061 | 3.000152  | -0.778792 |
| 6  | 0 | -1.450428 | 4.236158  | -0.675650 |
| 6  | 0 | -3.142444 | 2.823649  | -1.712202 |
| 6  | 0 | -1.831201 | 5.289435  | -1.509186 |
| 6  | 0 | -3.505474 | 3.878690  | -2.547558 |
| 6  | 0 | -2.851187 | 5.111689  | -2.448290 |
| 1  | 0 | -0.669121 | 4.384351  | 0.065969  |
| 1  | 0 | -3.642820 | 1.860333  | -1.772341 |
| 1  | 0 | -1.331457 | 6.251147  | -1.423053 |
| 1  | 0 | -4.299260 | 3.741004  | -3.277779 |
| 1  | 0 | -3.139227 | 5.933882  | -3.099134 |
| 16 | 0 | 0.000000  | -1.807794 | 0.576963  |
| 6  | 0 | 1.763029  | -1.841206 | 0.087724  |
| 8  | 0 | 2.540329  | -0.961694 | 0.385139  |
| 6  | 0 | 2.108061  | -3.000152 | -0.778792 |
| 6  | 0 | 1.450428  | -4.236158 | -0.675650 |
| 6  | 0 | 3.142444  | -2.823649 | -1.712202 |
| 6  | 0 | 1.831201  | -5.289435 | -1.509186 |
| 6  | 0 | 3.505474  | -3.878690 | -2.547558 |
| 6  | 0 | 2.851187  | -5.111689 | -2.448290 |
| 1  | 0 | 0.669121  | -4.384351 | 0.065969  |
| 1  | 0 | 3.642820  | -1.860333 | -1.772341 |



|   |   |          |           |           |
|---|---|----------|-----------|-----------|
| 1 | 0 | 1.331457 | -6.251147 | -1.423053 |
| 1 | 0 | 4.299260 | -3.741004 | -3.277779 |
| 1 | 0 | 3.139227 | -5.933882 | -3.099134 |

S(SOCC<sub>6</sub>H<sub>4</sub>OMe-2)<sub>2</sub> (7e)-*syn*

Total energy: -2109.3331641 hartrees

|    |   |           |           |           |
|----|---|-----------|-----------|-----------|
| 16 | 0 | 0.000000  | 0.000000  | 1.352658  |
| 16 | 0 | 0.000000  | 1.511725  | -0.151307 |
| 6  | 0 | 0.000000  | 2.831018  | 1.047238  |
| 8  | 0 | 0.000000  | 2.562785  | 2.240361  |
| 6  | 0 | 0.000000  | 4.243434  | 0.565000  |
| 6  | 0 | 0.000000  | 4.637212  | -0.789954 |
| 6  | 0 | 0.000000  | 5.235460  | 1.557185  |
| 6  | 0 | 0.000000  | 5.995904  | -1.128544 |
| 6  | 0 | 0.000000  | 6.586639  | 1.222521  |
| 6  | 0 | 0.000000  | 6.963102  | -0.122071 |
| 1  | 0 | 0.000000  | 4.915359  | 2.595210  |
| 1  | 0 | 0.000000  | 6.308152  | -2.167378 |
| 1  | 0 | 0.000000  | 7.340885  | 2.004694  |
| 1  | 0 | 0.000000  | 8.015249  | -0.397712 |
| 8  | 0 | 0.000000  | 3.631766  | -1.704721 |
| 6  | 0 | 0.000000  | 3.964626  | -3.085800 |
| 1  | 0 | 0.000000  | 3.008885  | -3.608707 |
| 1  | 0 | 0.897159  | 4.532844  | -3.352515 |
| 1  | 0 | -0.897159 | 4.532844  | -3.352515 |
| 16 | 0 | 0.000000  | -1.511725 | -0.151307 |
| 6  | 0 | 0.000000  | -2.831018 | 1.047238  |
| 8  | 0 | 0.000000  | -2.562785 | 2.240361  |
| 6  | 0 | 0.000000  | -4.243434 | 0.565000  |
| 6  | 0 | 0.000000  | -4.637212 | -0.789954 |
| 6  | 0 | 0.000000  | -5.235460 | 1.557185  |
| 6  | 0 | 0.000000  | -5.995904 | -1.128544 |
| 6  | 0 | 0.000000  | -6.586639 | 1.222521  |
| 6  | 0 | 0.000000  | -6.963102 | -0.122071 |
| 1  | 0 | 0.000000  | -4.915359 | 2.595210  |
| 1  | 0 | 0.000000  | -6.308152 | -2.167378 |
| 1  | 0 | 0.000000  | -7.340885 | 2.004694  |
| 1  | 0 | 0.000000  | -8.015249 | -0.397712 |
| 8  | 0 | 0.000000  | -3.631766 | -1.704721 |
| 6  | 0 | 0.000000  | -3.964626 | -3.085800 |
| 1  | 0 | 0.000000  | -3.008885 | -3.608707 |
| 1  | 0 | 0.897159  | -4.532844 | -3.352515 |
| 1  | 0 | -0.897159 | -4.532844 | -3.352515 |

S(SOCC<sub>6</sub>H<sub>4</sub>OMe-2)<sub>2</sub> (7e)-*anti*

Total energy: -2109.3515267 hartrees

|    |   |           |          |           |
|----|---|-----------|----------|-----------|
| 16 | 0 | 0.000000  | 0.000000 | 2.588728  |
| 16 | 0 | 0.000000  | 1.645998 | 1.337289  |
| 6  | 0 | -1.721488 | 1.597610 | 0.758975  |
| 8  | 0 | -2.498403 | 0.749092 | 1.147746  |
| 6  | 0 | -2.103257 | 2.578706 | -0.301513 |

|    |   |           |           |           |
|----|---|-----------|-----------|-----------|
| 6  | 0 | -1.424666 | 3.787297  | -0.565097 |
| 6  | 0 | -3.212699 | 2.237029  | -1.089051 |
| 6  | 0 | -1.854646 | 4.620885  | -1.604656 |
| 6  | 0 | -3.640467 | 3.064118  | -2.124802 |
| 6  | 0 | -2.956242 | 4.253739  | -2.380770 |
| 1  | 0 | -3.725843 | 1.305167  | -0.867874 |
| 1  | 0 | -1.346368 | 5.557226  | -1.809324 |
| 1  | 0 | -4.496618 | 2.780496  | -2.730868 |
| 1  | 0 | -3.278466 | 4.909157  | -3.186773 |
| 8  | 0 | -0.380097 | 4.077951  | 0.254297  |
| 6  | 0 | 0.455853  | 5.178547  | -0.076883 |
| 1  | 0 | 0.850137  | 5.077184  | -1.093455 |
| 1  | 0 | -0.082345 | 6.126935  | 0.024531  |
| 1  | 0 | 1.272025  | 5.143224  | 0.643744  |
| 16 | 0 | 0.000000  | -1.645998 | 1.337289  |
| 6  | 0 | 1.721488  | -1.597610 | 0.758975  |
| 8  | 0 | 2.498403  | -0.749092 | 1.147746  |
| 6  | 0 | 2.103257  | -2.578706 | -0.301513 |
| 6  | 0 | 1.424666  | -3.787297 | -0.565097 |
| 6  | 0 | 3.212699  | -2.237029 | -1.089051 |
| 6  | 0 | 1.854646  | -4.620885 | -1.604656 |
| 6  | 0 | 3.640467  | -3.064118 | -2.124802 |
| 6  | 0 | 2.956242  | -4.253739 | -2.380770 |
| 1  | 0 | 3.725843  | -1.305167 | -0.867874 |
| 1  | 0 | 1.346368  | -5.557226 | -1.809324 |
| 1  | 0 | 4.496618  | -2.780496 | -2.730868 |
| 1  | 0 | 3.278466  | -4.909157 | -3.186773 |
| 8  | 0 | 0.380097  | -4.077951 | 0.254297  |
| 6  | 0 | -0.455853 | -5.178547 | -0.076883 |
| 1  | 0 | -0.850137 | -5.077184 | -1.093455 |
| 1  | 0 | 0.082345  | -6.126935 | 0.024531  |
| 1  | 0 | -1.272025 | -5.143224 | 0.643744  |

Se(SOCC<sub>6</sub>H<sub>4</sub>OMe-2)<sub>2</sub> (**5e**)-*syn*

Total energy: -4111.7545049 hartrees

|    |   |          |          |           |
|----|---|----------|----------|-----------|
| 34 | 0 | 0.000000 | 0.000000 | 1.300651  |
| 16 | 0 | 0.000000 | 1.585933 | -0.322088 |
| 6  | 0 | 0.000000 | 2.887457 | 0.886766  |
| 8  | 0 | 0.000000 | 2.599072 | 2.079323  |
| 6  | 0 | 0.000000 | 4.309646 | 0.435335  |
| 6  | 0 | 0.000000 | 4.731989 | -0.911667 |
| 6  | 0 | 0.000000 | 5.280736 | 1.448555  |
| 6  | 0 | 0.000000 | 6.098094 | -1.219881 |
| 6  | 0 | 0.000000 | 6.638667 | 1.142906  |
| 6  | 0 | 0.000000 | 7.043790 | -0.193292 |
| 1  | 0 | 0.000000 | 4.939261 | 2.479753  |
| 1  | 0 | 0.000000 | 6.432887 | -2.251645 |
| 1  | 0 | 0.000000 | 7.375993 | 1.941067  |
| 1  | 0 | 0.000000 | 8.101546 | -0.446602 |
| 8  | 0 | 0.000000 | 3.748395 | -1.849391 |
| 6  | 0 | 0.000000 | 4.114209 | -3.222208 |

|    |   |           |           |           |
|----|---|-----------|-----------|-----------|
| 1  | 0 | 0.000000  | 3.171188  | -3.767583 |
| 1  | 0 | 0.897166  | 4.688529  | -3.475606 |
| 1  | 0 | -0.897166 | 4.688529  | -3.475606 |
| 16 | 0 | 0.000000  | -1.585933 | -0.322088 |
| 6  | 0 | 0.000000  | -2.887457 | 0.886766  |
| 8  | 0 | 0.000000  | -2.599072 | 2.079323  |
| 6  | 0 | 0.000000  | -4.309646 | 0.435335  |
| 6  | 0 | 0.000000  | -4.731989 | -0.911667 |
| 6  | 0 | 0.000000  | -5.280736 | 1.448555  |
| 6  | 0 | 0.000000  | -6.098094 | -1.219881 |
| 6  | 0 | 0.000000  | -6.638667 | 1.142906  |
| 6  | 0 | 0.000000  | -7.043790 | -0.193292 |
| 1  | 0 | 0.000000  | -4.939261 | 2.479753  |
| 1  | 0 | 0.000000  | -6.432887 | -2.251645 |
| 1  | 0 | 0.000000  | -7.375993 | 1.941067  |
| 1  | 0 | 0.000000  | -8.101546 | -0.446602 |
| 8  | 0 | 0.000000  | -3.748395 | -1.849391 |
| 6  | 0 | 0.000000  | -4.114209 | -3.222208 |
| 1  | 0 | 0.000000  | -3.171188 | -3.767583 |
| 1  | 0 | 0.897166  | -4.688529 | -3.475606 |
| 1  | 0 | -0.897166 | -4.688529 | -3.475606 |

Se(SOCC<sub>6</sub>H<sub>4</sub>OMe-2)<sub>2</sub> (**5e**)-*anti*

Total energy: -4111.7649057 hartrees

|    |   |           |           |           |
|----|---|-----------|-----------|-----------|
| 34 | 0 | 0.000000  | 0.000000  | 2.579597  |
| 16 | 0 | 0.190508  | 1.707159  | 1.194215  |
| 6  | 0 | -1.509471 | 1.811772  | 0.557309  |
| 8  | 0 | -2.397662 | 1.091401  | 0.962708  |
| 6  | 0 | -1.718838 | 2.741241  | -0.594903 |
| 6  | 0 | -0.953924 | 3.900465  | -0.842768 |
| 6  | 0 | -2.748785 | 2.399039  | -1.483239 |
| 6  | 0 | -1.220529 | 4.684905  | -1.971407 |
| 6  | 0 | -3.011439 | 3.177019  | -2.608788 |
| 6  | 0 | -2.243040 | 4.317193  | -2.849596 |
| 1  | 0 | -3.330726 | 1.506174  | -1.270607 |
| 1  | 0 | -0.647690 | 5.585085  | -2.167816 |
| 1  | 0 | -3.805552 | 2.893799  | -3.294305 |
| 1  | 0 | -2.436957 | 4.934005  | -3.724210 |
| 8  | 0 | 0.000000  | 4.197205  | 0.078976  |
| 6  | 0 | 0.919943  | 5.240369  | -0.213006 |
| 1  | 0 | 1.425382  | 5.059929  | -1.167584 |
| 1  | 0 | 0.419644  | 6.214498  | -0.231599 |
| 1  | 0 | 1.644064  | 5.217591  | 0.600435  |
| 16 | 0 | -0.190508 | -1.707159 | 1.194215  |
| 6  | 0 | 1.509471  | -1.811772 | 0.557309  |
| 8  | 0 | 2.397662  | -1.091401 | 0.962708  |
| 6  | 0 | 1.718838  | -2.741241 | -0.594903 |
| 6  | 0 | 0.953924  | -3.900465 | -0.842768 |
| 6  | 0 | 2.748785  | -2.399039 | -1.483239 |
| 6  | 0 | 1.220529  | -4.684905 | -1.971407 |
| 6  | 0 | 3.011439  | -3.177019 | -2.608788 |

|   |   |           |           |           |
|---|---|-----------|-----------|-----------|
| 6 | 0 | 2.243040  | -4.317193 | -2.849596 |
| 1 | 0 | 3.330726  | -1.506174 | -1.270607 |
| 1 | 0 | 0.647690  | -5.585085 | -2.167816 |
| 1 | 0 | 3.805552  | -2.893799 | -3.294305 |
| 1 | 0 | 2.436957  | -4.934005 | -3.724210 |
| 8 | 0 | 0.000000  | -4.197205 | 0.078976  |
| 6 | 0 | -0.919943 | -5.240369 | -0.213006 |
| 1 | 0 | -1.425382 | -5.059929 | -1.167584 |
| 1 | 0 | -0.419644 | -6.214498 | -0.231599 |
| 1 | 0 | -1.644064 | -5.217591 | 0.600435  |

Te(SOCC<sub>6</sub>H<sub>4</sub>OMe-2)<sub>2</sub> (**6e**)-*syn*

Total energy: -8323.5999567 hartrees

|    |   |           |           |           |
|----|---|-----------|-----------|-----------|
| 52 | 0 | 0.000000  | 0.000000  | 1.269788  |
| 16 | 0 | 0.000000  | 1.654027  | -0.532928 |
| 6  | 0 | 0.000000  | 2.922673  | 0.688001  |
| 8  | 0 | 0.000000  | 2.588083  | 1.880071  |
| 6  | 0 | 0.000000  | 4.362081  | 0.306345  |
| 6  | 0 | 0.000000  | 4.849167  | -1.020730 |
| 6  | 0 | 0.000000  | 5.283741  | 1.366311  |
| 6  | 0 | 0.000000  | 6.230000  | -1.257610 |
| 6  | 0 | 0.000000  | 6.654866  | 1.128392  |
| 6  | 0 | 0.000000  | 7.124639  | -0.186385 |
| 1  | 0 | 0.000000  | 4.892335  | 2.379734  |
| 1  | 0 | 0.000000  | 6.616366  | -2.271131 |
| 1  | 0 | 0.000000  | 7.351929  | 1.961960  |
| 1  | 0 | 0.000000  | 8.193464  | -0.388145 |
| 8  | 0 | 0.000000  | 3.918744  | -2.009550 |
| 6  | 0 | 0.000000  | 4.360558  | -3.359946 |
| 1  | 0 | 0.000000  | 3.448865  | -3.956239 |
| 1  | 0 | 0.897124  | 4.947914  | -3.582128 |
| 1  | 0 | -0.897124 | 4.947914  | -3.582128 |
| 16 | 0 | 0.000000  | -1.654027 | -0.532928 |
| 6  | 0 | 0.000000  | -2.922673 | 0.688001  |
| 8  | 0 | 0.000000  | -2.588083 | 1.880071  |
| 6  | 0 | 0.000000  | -4.362081 | 0.306345  |
| 6  | 0 | 0.000000  | -4.849167 | -1.020730 |
| 6  | 0 | 0.000000  | -5.283741 | 1.366311  |
| 6  | 0 | 0.000000  | -6.230000 | -1.257610 |
| 6  | 0 | 0.000000  | -6.654866 | 1.128392  |
| 6  | 0 | 0.000000  | -7.124639 | -0.186385 |
| 1  | 0 | 0.000000  | -4.892335 | 2.379734  |
| 1  | 0 | 0.000000  | -6.616366 | -2.271131 |
| 1  | 0 | 0.000000  | -7.351929 | 1.961960  |
| 1  | 0 | 0.000000  | -8.193464 | -0.388145 |
| 8  | 0 | 0.000000  | -3.918744 | -2.009550 |
| 6  | 0 | 0.000000  | -4.360558 | -3.359946 |
| 1  | 0 | 0.000000  | -3.448865 | -3.956239 |
| 1  | 0 | 0.897124  | -4.947914 | -3.582128 |
| 1  | 0 | -0.897124 | -4.947914 | -3.582128 |

Te(SOCC<sub>6</sub>H<sub>4</sub>OMe-2)<sub>2</sub> (**6e**)-*anti*

Total energy: -8323.600841

|    |   |           |           |           |
|----|---|-----------|-----------|-----------|
| 52 | 0 | 0.000000  | 0.000000  | 2.143429  |
| 16 | 0 | 0.649506  | 1.697722  | 0.620883  |
| 6  | 0 | -0.981569 | 2.408030  | 0.209210  |
| 8  | 0 | -2.018975 | 1.847936  | 0.494785  |
| 6  | 0 | -0.959039 | 3.768488  | -0.406025 |
| 6  | 0 | 0.047579  | 4.229428  | -1.279982 |
| 6  | 0 | -2.014767 | 4.623609  | -0.058540 |
| 6  | 0 | 0.000000  | 5.542069  | -1.764228 |
| 6  | 0 | -2.058831 | 5.931593  | -0.538052 |
| 6  | 0 | -1.048402 | 6.385991  | -1.387206 |
| 1  | 0 | -2.786361 | 4.243686  | 0.606373  |
| 1  | 0 | 0.761082  | 5.908658  | -2.445197 |
| 1  | 0 | -2.873442 | 6.590669  | -0.250358 |
| 1  | 0 | -1.070871 | 7.404446  | -1.768251 |
| 8  | 0 | 0.998149  | 3.322738  | -1.627641 |
| 6  | 0 | 2.149919  | 3.786375  | -2.319810 |
| 1  | 0 | 1.897147  | 4.115418  | -3.333535 |
| 1  | 0 | 2.632977  | 4.601645  | -1.770734 |
| 1  | 0 | 2.816921  | 2.926697  | -2.370929 |
| 16 | 0 | -0.649506 | -1.697722 | 0.620883  |
| 6  | 0 | 0.981569  | -2.408030 | 0.209210  |
| 8  | 0 | 2.018975  | -1.847936 | 0.494785  |
| 6  | 0 | 0.959039  | -3.768488 | -0.406025 |
| 6  | 0 | -0.047579 | -4.229428 | -1.279982 |
| 6  | 0 | 2.014767  | -4.623609 | -0.058540 |
| 6  | 0 | 0.000000  | -5.542069 | -1.764228 |
| 6  | 0 | 2.058831  | -5.931593 | -0.538052 |
| 6  | 0 | 1.048402  | -6.385991 | -1.387206 |
| 1  | 0 | 2.786361  | -4.243686 | 0.606373  |
| 1  | 0 | -0.761082 | -5.908658 | -2.445197 |
| 1  | 0 | 2.873442  | -6.590669 | -0.250358 |
| 1  | 0 | 1.070871  | -7.404446 | -1.768251 |
| 8  | 0 | -0.998149 | -3.322738 | -1.627641 |
| 6  | 0 | -2.149919 | -3.786375 | -2.319810 |
| 1  | 0 | -1.897147 | -4.115418 | -3.333535 |
| 1  | 0 | -2.632977 | -4.601645 | -1.770734 |
| 1  | 0 | -2.816921 | -2.926697 | -2.370929 |

---
